# Supplementary material for: Zebrafish atoh8 mutants do not recapitulate morpholino phenotypes
Source: PLoS One. 2017 Feb 9;12(2):e0171143. doi: 10.1371/journal.pone.0171143 (PMC5300237; doi:10.1371/journal.pone.0171143)
Supplement: S1 Table — (XLSX) [file pone.0171143.s004.xlsx]

## Sheet: Sheet1
Include	Pos	Name	Cp	Concentration	Standard	Status		actin	fli1a	gata1a	hbae3	l-plastin	kdrl	actin	fli1a	gata1a	hbae3	l-plastin	kdrl	actin	fli1a	gata1a	hbae3	l-plastin	kdrl		actin	fli1a	gata1a	hbae3	l-plastin	kdrl		fli1a	gata1a	hbae3	l-plastin	kdrl				fli1a	gata1a	hbae3	l-plastin	kdrl
							29hpf, atoh8 WT																			29hpf							To actin							29hpf
TRUE	A1	Sample 1	16.69		0		1	16.69	25	27.21	17.95	24.89		-1.29487	-1.64863	-1.7533	-2.23669	-1.41091		0.12443	0.0704137	0.0594976	0.0273286	0.103232		pos1	0.136493	0.0717664	0.062236	0.0305036	0.100073			0.52579	0.455966	0.223482	0.733174			WT	mean	0.407038	0.611889	0.322389	0.675984
																																									SD	0.0898084	0.214093	0.14498	0.103351
TRUE	A2	Sample 2	16.44		0			16.44	24.95	27.1	17.65	24.99		-1.18476	-1.6252	-1.69858	-2.10688	-1.45016		0.148555	0.073119	0.0649743	0.0336786	0.0969134
																																								null	mean	0.472431	0.659017	0.270408	0.61653
TRUE	A3	Sample 3	16.16		0		2	16.16	24.66	27.01	18.04	24.84		-1.06144	-1.48934	-1.65382	-2.27564	-1.39129		0.18117	0.0909902	0.0698283	0.0256683	0.106545		pos2	0.19277	0.0864325	0.0674013	0.0266901	0.104889			0.44837	0.349646	0.138456	0.544112				SD	0.0562898	0.175108	0.0878886	0.0791911
TRUE	A4	Sample 4	15.99		0			15.99	24.8	27.1	17.93	24.89		-0.986567	-1.55493	-1.69858	-2.22804	-1.41091		0.204371	0.0818747	0.0649743	0.0277119	0.103232																72hpf
																																								WT	mean	0.544772	1.94136	0.876395	1.14035	1.02114
TRUE	A5	Sample 5	17.09		0		3	17.09	26.26	27.08	17.49	25.91		-1.47104	-2.23893	-1.68863	-2.03765	-1.81122		0.09371	0.0272304	0.066023	0.0376484	0.0542011		pos3	0.0985984	0.0278605	0.0684891	0.0445768	0.0580452			0.282565	0.694627	0.452104	0.588704				SD	0.131636	0.762111	0.218389	0.16378	0.15712
TRUE	A6	Sample 6	16.95		0			16.95	26.2	26.99	17.04	25.7		-1.40938	-2.21082	-1.64387	-1.84293	-1.72881		0.103487	0.0284906	0.0709552	0.0515051	0.0618893																null	mean	0.711167	2.59784	1.17333	1.28979	1.23016
																																									SD	0.272561	1.05101	0.256976	0.399716	0.462589
TRUE	A7	Sample 7	16.82		0		4	16.82	25.65	26.51	17.22	25.15		-1.35213	-1.95315	-1.40512	-1.92081	-1.51295		0.113476	0.0431327	0.104198	0.0454369	0.0875976		pos4	0.117214	0.0441307	0.105039	0.055809	0.0857032			0.376497	0.896133	0.476129	0.73117
TRUE	A8	Sample 8	16.73		0			16.73	25.59	26.49	16.68	25.22		-1.31249	-1.92504	-1.39518	-1.68715	-1.54042		0.120952	0.0451288	0.10588	0.0661811	0.0838089																To WT average
																																										fli1a	gata1a	hbae3	l-plastin	kdrl
TRUE	A9	Sample 9	16.54		0		5	16.54	25.26	26.65	17.47	24.74		-1.2288	-1.77044	-1.47476	-2.02899	-1.35204		0.138389	0.0578785	0.0931513	0.0381765	0.113492		pos5	0.144533	0.0580975	0.0958357	0.0465066	0.113134			0.401968	0.663072	0.321772	0.782759			29hpf
																																								WT	mean	1	1	1	1
TRUE	A10	Sample 10	16.42		0			16.42	25.25	26.58	16.95	24.75		-1.17595	-1.76575	-1.43994	-1.80398	-1.35597		0.150676	0.0583165	0.0985201	0.0548367	0.112777																	SD	0.220639	0.349889	0.449705	0.152889
							29hpf, atoh8 sa1465
TRUE	A11	Sample 11	16.65		0		1	16.65	25.19	26.54	17.59	25.08		-1.27725	-1.73764	-1.42004	-2.08092	-1.48548		0.128009	0.0610154	0.101726	0.0351157	0.0915577		neg1	0.132225	0.060109	0.102135	0.0414113	0.0918478			0.454596	0.772431	0.313188	0.694633			null	mean	1.16065	1.07702	0.838765	0.912048
																																									SD	0.138291	0.286176	0.272617	0.117149
TRUE	A12	Sample 12	16.56		0			16.56	25.23	26.53	17.15	25.07		-1.23761	-1.75638	-1.41507	-1.89052	-1.48155		0.136441	0.0592026	0.102543	0.0477068	0.0921379
																																								72hpf
TRUE	A13	Sample 13	16.62		0		2	16.62	24.8	26.9	17.99	25.28		-1.26404	-1.55493	-1.5991	-2.254	-1.56397		0.13076	0.0818747	0.076256	0.0265778	0.080692		neg2	0.133601	0.0735872	0.0727637	0.0278371	0.0849827			0.5508	0.544636	0.208361	0.636095			WT	mean	1	1	1	1	1
																																									SD	0.241635	0.392565	0.24919	0.143623	0.153867
TRUE	A14	Sample 14	16.56		0			16.56	25.1	27.02	17.86	25.12		-1.23761	-1.69548	-1.65879	-2.19775	-1.50118		0.136441	0.0652997	0.0692715	0.0290964	0.0892734
																																								null	mean	1.30544	1.33815	1.33882	1.13105	1.20469
TRUE	A15	Sample 15	16.29		0		3	16.29	24.68	27.2	18.46	25.13		-1.1187	-1.49871	-1.74832	-2.45738	-1.5051		0.165221	0.0896284	0.0599758	0.0191587	0.0887113		neg3	0.173195	0.0906536	0.0590308	0.0206673	0.0867928			0.523419	0.340834	0.11933	0.501127				SD	0.500321	0.54138	0.293219	0.350522	0.453012
TRUE	A16	Sample 16	16.16		0			16.16	24.65	27.24	18.25	25.2		-1.06144	-1.48466	-1.76822	-2.36651	-1.53257		0.18117	0.0916789	0.0580857	0.0221759	0.0848743
TRUE	A17	Sample 17	16.88		0		4	16.88	25.58	26.73	17.56	25.73		-1.37855	-1.92036	-1.51455	-2.06794	-1.74058		0.108751	0.0454704	0.0873727	0.0358571	0.0607276		neg4	0.113161	0.0459905	0.084336	0.0363635	0.0621003			0.406418	0.745276	0.321344	0.548779
TRUE	A18	Sample 18	16.77		0			16.77	25.55	26.82	17.52	25.66		-1.3301	-1.9063	-1.55931	-2.05063	-1.71311		0.11757	0.0465107	0.0812993	0.03687	0.0634729
TRUE	A19	Sample 19	17.44		0		5	17.44	25.43	26.74	17.48	25.59		-1.62519	-1.85008	-1.51952	-2.03332	-1.68564		0.0731205	0.0509153	0.0866761	0.0379115	0.0663424		neg5	0.0996636	0.0503459	0.0877295	0.0385832	0.0682828			0.505158	0.880256	0.387134	0.685132
TRUE	A20	Sample 20	16.67		0			16.67	25.46	26.71	17.43	25.5		-1.28606	-1.86414	-1.5046	-2.01168	-1.65031		0.126207	0.0497765	0.0887829	0.0392549	0.0702231
TRUE	A21	Sample 21	16.79		0		6	16.79	25.51	26.92	17.93	25.61		-1.33891	-1.88756	-1.60905	-2.22804	-1.69349		0.115915	0.0479348	0.0750448	0.0277119	0.0655096		neg6	0.118433	0.0481162	0.0772074	0.0288151	0.0663477			0.406272	0.651906	0.243302	0.560211
TRUE	A22	Sample 22	16.73		0			16.73	25.5	26.85	17.82	25.57		-1.31249	-1.88288	-1.57424	-2.18044	-1.67779		0.120952	0.0482976	0.0793701	0.0299183	0.0671858
TRUE	A23	Sample 23	16.73		0		7	16.73	25.2	26.75	17.47	25.21		-1.31249	-1.74233	-1.5245	-2.02899	-1.5365		0.120952	0.060557	0.085985	0.0381765	0.0843399		neg7	0.125856	0.0579377	0.0853022	0.0377818	0.0868067			0.46035	0.677777	0.300199	0.689731
TRUE	A24	Sample 24	16.62		0			16.62	25.32	26.77	17.5	25.12		-1.26404	-1.79855	-1.53444	-2.04197	-1.50118		0.13076	0.0553183	0.0846193	0.0373871	0.0892734
							72hpf, atoh8 WT																			72hpf
TRUE	B1	Sample 25	16.84		0		1	16.84	25.06	24.99	15.88	24.53	24.05	-1.36093	-1.67674	-0.649092	-1.34098	-1.26962	-1.32042	0.111879	0.0672991	0.351807	0.11553	0.12959	0.119416	pos1	0.104485	0.0710455	0.335695	0.111644	0.132948	0.122452		0.67996	3.21286	1.06852	1.27242	1.17196
TRUE	B2	Sample 26	17.04		0			17.04	24.92	25.11	15.98	24.45	23.98	-1.44902	-1.61115	-0.708779	-1.38425	-1.23823	-1.28961	0.0970909	0.0747919	0.319584	0.107758	0.136307	0.125487
TRUE	B3	Sample 27	18.05		0		2	18.05	26.79	27.03	17.79	26.05	25.71	-1.89386	-2.48723	-1.66377	-2.16746	-1.86617	-2.05106	0.0474517	0.0182599	0.0687192	0.0305499	0.0496139	0.0368445	pos2	0.0483076	0.0183986	0.0684452	0.0314251	0.0499293	0.0372402		0.380864	1.41686	0.650521	1.03357	0.770897
TRUE	B4	Sample 28	18		0			18	26.77	27.04	17.71	26.03	25.68	-1.87183	-2.47786	-1.66874	-2.13284	-1.85832	-2.03785	0.0491636	0.0185373	0.0681713	0.0323003	0.0502447	0.0376359
TRUE	B5	Sample 29	18.47		0		3	18.47	26.6	27.09	18.15	26.08	25.34	-2.07884	-2.39822	-1.69361	-2.32324	-1.87794	-1.8882	0.0352334	0.0210725	0.0654965	0.0237754	0.0486826	0.0478853	pos3	0.039719	0.0210725	0.067943	0.0236929	0.0489921	0.0451688		0.53054	1.71059	0.596512	1.23347	1.13721
TRUE	B6	Sample 30	18.15		0			18.15	26.6	27	18.16	26.06	25.51	-1.9379	-2.39822	-1.64884	-2.32756	-1.87009	-1.96303	0.0442045	0.0210725	0.0703895	0.0236104	0.0493015	0.0424524
TRUE	B7	Sample 31	16.8		0		4	16.8	25.07	25.63	16.18	24.51	23.87	-1.34332	-1.68142	-0.967421	-1.47079	-1.26177	-1.2412	0.115096	0.0667936	0.210767	0.0937477	0.131237	0.135656	pos4	0.11469	0.0686037	0.197358	0.0992729	0.131653	0.127961		0.598166	1.7208	0.865576	1.14791	1.11571
TRUE	B8	Sample 32	16.81		0			16.81	25	25.8	16.02	24.5	24.04	-1.34772	-1.64863	-1.05198	-1.40156	-1.25785	-1.31602	0.114284	0.0704137	0.18395	0.104798	0.132069	0.120265
TRUE	B9	Sample 33	16.56		0		5	16.56	25.46	26.04	15.74	24.64	24.13	-1.23761	-1.86414	-1.17135	-1.2804	-1.31279	-1.35563	0.136441	0.0497765	0.151796	0.127362	0.120892	0.112837	pos5	0.136441	0.0547136	0.154896	0.128255	0.118277	0.122352		0.401005	1.13526	0.940003	0.866873	0.896737
TRUE	B10	Sample 34	16.56		0			16.56	25.22	25.99	15.72	24.71	23.91	-1.23761	-1.7517	-1.14648	-1.27174	-1.34027	-1.2588	0.136441	0.0596507	0.157995	0.129148	0.115663	0.131867
TRUE	B11	Sample 35	16.75		0		6	16.75	24.76	25.13	15.47	24.29	23.9	-1.32129	-1.53619	-0.718727	-1.16357	-1.17543	-1.2544	0.119249	0.0843817	0.314508	0.15371	0.150802	0.132804	pos6	0.129311	0.087686	0.317046	0.147058	0.166534	0.133751		0.6781	2.4518	1.13724	1.28785	1.03434
TRUE	B12	Sample 36	16.53		0			16.53	24.66	25.11	15.6	23.99	23.88	-1.2244	-1.48934	-0.708779	-1.21982	-1.05769	-1.2456	0.139374	0.0909902	0.319584	0.140405	0.182266	0.134699
							72h, atoh8 sa1465
TRUE	B13	Sample 37	16.59		0		1	16.59	24.88	25.49	15.96	24.27	23.88	-1.25083	-1.59241	-0.897787	-1.37559	-1.16758	-1.2456	0.13357	0.077082	0.235762	0.10927	0.15272	0.134699	neg1	0.131703	0.0788657	0.238627	0.10927	0.145817	0.130988		0.598813	1.81185	0.829666	1.10716	0.99457
TRUE	B14	Sample 38	16.63		0			16.63	24.82	25.46	15.96	24.42	23.96	-1.26844	-1.5643	-0.882865	-1.37559	-1.22645	-1.28081	0.129836	0.0806493	0.241493	0.10927	0.138914	0.127278
TRUE	B15	Sample 39	16.72		0		2	16.72	25.06	25.51	16.46	26.2	24.02	-1.30808	-1.67674	-0.907734	-1.59195	-1.92504	-1.30722	0.121812	0.0672991	0.232018	0.0771389	0.045129	0.121981	neg2	0.119691	0.0696619	0.24787	0.0816852	0.0881832	0.125538		0.582014	2.07091	0.682467	0.736757	1.04885
TRUE	B16	Sample 40	16.77		0			16.77	24.97	25.35	16.3	24.51	23.94	-1.3301	-1.63457	-0.828152	-1.52272	-1.26177	-1.27201	0.11757	0.0720247	0.263722	0.0862315	0.131237	0.129094
TRUE	B17	Sample 41	16.76		0		3	16.76	25.08	25.64	15.86	24.46	24.07	-1.3257	-1.68611	-0.972395	-1.33232	-1.24215	-1.32923	0.118407	0.0662919	0.209086	0.117151	0.135448	0.117737	neg3	0.124121	0.0660429	0.21423	0.11756	0.137181	0.114493		0.532083	1.72597	0.947139	1.10522	0.922429
TRUE	B18	Sample 42	16.63		0			16.63	25.09	25.58	15.85	24.42	24.15	-1.26844	-1.69079	-0.942552	-1.328	-1.22645	-1.36444	0.129836	0.0657939	0.219374	0.11797	0.138914	0.11125
TRUE	B19	Sample 43	16.59		0		4	16.59	24.74	25.29	15.45	25.73	23.75	-1.25083	-1.52682	-0.798309	-1.15491	-1.74058	-1.18838	0.13357	0.0856639	0.276698	0.155866	0.0607276	0.147692	neg4	0.136472	0.0890183	0.273415	0.165052	0.113258	0.149815		0.652282	2.00345	1.20942	0.829902	1.09777
TRUE	B20	Sample 44	16.53		0			16.53	24.64	25.32	15.29	24.14	23.71	-1.2244	-1.47997	-0.813231	-1.08568	-1.11656	-1.17077	0.139374	0.0923728	0.270132	0.174239	0.165789	0.151937
TRUE	B21	Sample 45	16.64		0		5	16.64	24.92	24.86	15.57	24.14	23.98	-1.27285	-1.61115	-0.584432	-1.20684	-1.11656	-1.28961	0.128919	0.0747919	0.390391	0.14337	0.165789	0.125487	neg5	0.111315	0.0756474	0.399995	0.145395	0.171194	0.125044		0.679582	3.59337	1.30616	1.53793	1.12334
TRUE	B22	Sample 46	17.09		0			17.09	24.89	24.8	15.53	24.04	23.99	-1.47104	-1.5971	-0.554588	-1.18953	-1.07732	-1.29401	0.09371	0.076503	0.409599	0.14742	0.176599	0.124601
TRUE	B23	Sample 47	16.89		0		6	16.89	25.26	25.7	15.86	24.58	24.28	-1.38296	-1.77044	-1.00224	-1.33232	-1.28925	-1.42165	0.107983	0.0578785	0.199281	0.117151	0.125561	0.101463	neg6	0.109536	0.0559798	0.195371	0.0976859	0.123995	0.105574		0.511063	1.78363	0.891817	1.132	0.963828
TRUE	B24	Sample 48	16.85		0			16.85	25.35	25.75	16.44	24.62	24.17	-1.36534	-1.8126	-1.02711	-1.5833	-1.30495	-1.37324	0.111089	0.0540811	0.191462	0.0782209	0.122429	0.109685
							Standards, serial 5x
TRUE	C1	Sample 49	25		0		-1	16.24	23.92	25.72	15	24.12	23.58
TRUE	C2	Sample 50	24.95		0		-1	16.14	23.78	25.67	15.29	24.07	23.34
TRUE	C3	Sample 51	24.66		0		-2	18.11	25.52	27.55	17.28	26.21	25.33
TRUE	C4	Sample 52	24.8		0		-2	18.1	25.63	27.69	17.45	26.12	25.54
TRUE	C5	Sample 53	26.26		0		-3	20.48	27.75	29.78	19.7	28.46	27.81
TRUE	C6	Sample 54	26.2		0		-3	20.53	27.59	30	19.7	28.81	27.73
TRUE	C7	Sample 55	25.65		0		-4	22.82	30.03	31.85	21.94	31.7	30.56
TRUE	C8	Sample 56	25.59		0		-4	22.82	30.03	31.43	21.97	31.83	29.95
TRUE	C9	Sample 57	25.26		0		-5	25.07	32.33	36.22	24.35	32.88	32.15
TRUE	C10	Sample 58	25.25		0		-5	25.3	32.26	33.78	24.46	33.98	31.83
TRUE	C11	Sample 59	25.19		0		NTC	39.48	0	0	40	0	40
TRUE	C12	Sample 60	25.23		0		NTC	40	0	0	40	0	40
TRUE	C13	Sample 61	24.8		0		gradient	-2.2705	-2.1345	-2.0105	-2.311	-2.548	-2.272
							intercept	13.75	21.481	23.685	12.781	21.295	21.05
TRUE	C14	Sample 62	25.1		0
TRUE	C15	Sample 63	24.68		0
TRUE	C16	Sample 64	24.65		0
TRUE	C17	Sample 65	25.58		0
TRUE	C18	Sample 66	25.55		0
TRUE	C19	Sample 67	25.43		0
TRUE	C20	Sample 68	25.46		0
TRUE	C21	Sample 69	25.51		0
TRUE	C22	Sample 70	25.5		0
TRUE	C23	Sample 71	25.2		0
TRUE	C24	Sample 72	25.32		0
TRUE	D1	Sample 73	25.06		0
TRUE	D2	Sample 74	24.92		0
TRUE	D3	Sample 75	26.79		0
TRUE	D4	Sample 76	26.77		0
TRUE	D5	Sample 77	26.6		0
TRUE	D6	Sample 78	26.6		0
TRUE	D7	Sample 79	25.07		0
TRUE	D8	Sample 80	25		0
TRUE	D9	Sample 81	25.46		0
TRUE	D10	Sample 82	25.22		0
TRUE	D11	Sample 83	24.76		0
TRUE	D12	Sample 84	24.66		0
TRUE	D13	Sample 85	24.88		0
TRUE	D14	Sample 86	24.82		0
TRUE	D15	Sample 87	25.06		0
TRUE	D16	Sample 88	24.97		0
TRUE	D17	Sample 89	25.08		0
TRUE	D18	Sample 90	25.09		0
TRUE	D19	Sample 91	24.74		0
TRUE	D20	Sample 92	24.64		0
TRUE	D21	Sample 93	24.92		0
TRUE	D22	Sample 94	24.89		0
TRUE	D23	Sample 95	25.26		0
TRUE	D24	Sample 96	25.35		0
TRUE	E1	Sample 97	27.21		0
TRUE	E2	Sample 98	27.1		0
TRUE	E3	Sample 99	27.01		0
TRUE	E4	Sample 100	27.1		0
TRUE	E5	Sample 101	27.08		0
TRUE	E6	Sample 102	26.99		0
TRUE	E7	Sample 103	26.51		0
TRUE	E8	Sample 104	26.49		0
TRUE	E9	Sample 105	26.65		0
TRUE	E10	Sample 106	26.58		0
TRUE	E11	Sample 107	26.54		0
TRUE	E12	Sample 108	26.53		0
TRUE	E13	Sample 109	26.9		0
TRUE	E14	Sample 110	27.02		0
TRUE	E15	Sample 111	27.2		0
TRUE	E16	Sample 112	27.24		0
TRUE	E17	Sample 113	26.73		0
TRUE	E18	Sample 114	26.82		0
TRUE	E19	Sample 115	26.74		0
TRUE	E20	Sample 116	26.71		0
TRUE	E21	Sample 117	26.92		0
TRUE	E22	Sample 118	26.85		0
TRUE	E23	Sample 119	26.75		0
TRUE	E24	Sample 120	26.77		0
TRUE	F1	Sample 121	24.99		0
TRUE	F2	Sample 122	25.11		0
TRUE	F3	Sample 123	27.03		0
TRUE	F4	Sample 124	27.04		0
TRUE	F5	Sample 125	27.09		0
TRUE	F6	Sample 126	27		0
TRUE	F7	Sample 127	25.63		0
TRUE	F8	Sample 128	25.8		0
TRUE	F9	Sample 129	26.04		0
TRUE	F10	Sample 130	25.99		0
TRUE	F11	Sample 131	25.13		0
TRUE	F12	Sample 132	25.11		0
TRUE	F13	Sample 133	25.49		0
TRUE	F14	Sample 134	25.46		0
TRUE	F15	Sample 135	25.51		0
TRUE	F16	Sample 136	25.35		0
TRUE	F17	Sample 137	25.64		0
TRUE	F18	Sample 138	25.58		0
TRUE	F19	Sample 139	25.29		0
TRUE	F20	Sample 140	25.32		0
TRUE	F21	Sample 141	24.86		0
TRUE	F22	Sample 142	24.8		0
TRUE	F23	Sample 143	25.7		0
TRUE	F24	Sample 144	25.75		0
TRUE	G1	Sample 145	17.95		0
TRUE	G2	Sample 146	17.65		0
TRUE	G3	Sample 147	18.04		0
TRUE	G4	Sample 148	17.93		0
TRUE	G5	Sample 149	17.49		0
TRUE	G6	Sample 150	17.04		0
TRUE	G7	Sample 151	17.22		0
TRUE	G8	Sample 152	16.68		0
TRUE	G9	Sample 153	17.47		0
TRUE	G10	Sample 154	16.95		0
TRUE	G11	Sample 155	17.59		0
TRUE	G12	Sample 156	17.15		0
TRUE	G13	Sample 157	17.99		0
TRUE	G14	Sample 158	17.86		0
TRUE	G15	Sample 159	18.46		0
TRUE	G16	Sample 160	18.25		0
TRUE	G17	Sample 161	17.56		0
TRUE	G18	Sample 162	17.52		0
TRUE	G19	Sample 163	17.48		0
TRUE	G20	Sample 164	17.43		0
TRUE	G21	Sample 165	17.93		0
TRUE	G22	Sample 166	17.82		0
TRUE	G23	Sample 167	17.47		0
TRUE	G24	Sample 168	17.5		0
TRUE	H1	Sample 169	15.88		0
TRUE	H2	Sample 170	15.98		0
TRUE	H3	Sample 171	17.79		0
TRUE	H4	Sample 172	17.71		0
TRUE	H5	Sample 173	18.15		0
TRUE	H6	Sample 174	18.16		0
TRUE	H7	Sample 175	16.18		0
TRUE	H8	Sample 176	16.02		0
TRUE	H9	Sample 177	15.74		0
TRUE	H10	Sample 178	15.72		0
TRUE	H11	Sample 179	15.47		0
TRUE	H12	Sample 180	15.6		0
TRUE	H13	Sample 181	15.96		0
TRUE	H14	Sample 182	15.96		0
TRUE	H15	Sample 183	16.46		0
TRUE	H16	Sample 184	16.3		0
TRUE	H17	Sample 185	15.86		0
TRUE	H18	Sample 186	15.85		0
TRUE	H19	Sample 187	15.45		0
TRUE	H20	Sample 188	15.29		0
TRUE	H21	Sample 189	15.57		0
TRUE	H22	Sample 190	15.53		0
TRUE	H23	Sample 191	15.86		0
TRUE	H24	Sample 192	16.44		0
TRUE	I1	Sample 193	24.89		0
TRUE	I2	Sample 194	24.99		0
TRUE	I3	Sample 195	24.84		0
TRUE	I4	Sample 196	24.89		0
TRUE	I5	Sample 197	25.91		0
TRUE	I6	Sample 198	25.7		0
TRUE	I7	Sample 199	25.15		0
TRUE	I8	Sample 200	25.22		0
TRUE	I9	Sample 201	24.74		0
TRUE	I10	Sample 202	24.75		0
TRUE	I11	Sample 203	25.08		0
TRUE	I12	Sample 204	25.07		0
TRUE	I13	Sample 205	25.28		0
TRUE	I14	Sample 206	25.12		0
TRUE	I15	Sample 207	25.13		0
TRUE	I16	Sample 208	25.2		0
TRUE	I17	Sample 209	25.73		0
TRUE	I18	Sample 210	25.66		0
TRUE	I19	Sample 211	25.59		0
TRUE	I20	Sample 212	25.5		0
TRUE	I21	Sample 213	25.61		0
TRUE	I22	Sample 214	25.57		0
TRUE	I23	Sample 215	25.21		0
TRUE	I24	Sample 216	25.12		0
TRUE	J1	Sample 217	24.53		0
TRUE	J2	Sample 218	24.45		0
TRUE	J3	Sample 219	26.05		0
TRUE	J4	Sample 220	26.03		0
TRUE	J5	Sample 221	26.08		0
TRUE	J6	Sample 222	26.06		0
TRUE	J7	Sample 223	24.51		0
TRUE	J8	Sample 224	24.5		0
TRUE	J9	Sample 225	24.64		0
TRUE	J10	Sample 226	24.71		0
TRUE	J11	Sample 227	24.29		0
TRUE	J12	Sample 228	23.99		0
TRUE	J13	Sample 229	24.27		0
TRUE	J14	Sample 230	24.42		0
TRUE	J15	Sample 231	26.2		0
TRUE	J16	Sample 232	24.51		0
TRUE	J17	Sample 233	24.46		0
TRUE	J18	Sample 234	24.42		0
TRUE	J19	Sample 235	25.73		0
TRUE	J20	Sample 236	24.14		0
TRUE	J21	Sample 237	24.14		0
TRUE	J22	Sample 238	24.04		0
TRUE	J23	Sample 239	24.58		0
TRUE	J24	Sample 240	24.62		0
TRUE	K1	Sample 241	16.8		0
TRUE	K2	Sample 242	16.83		0
TRUE	K3	Sample 243	16.89		0
TRUE	K4	Sample 244	16.92		0
TRUE	K5	Sample 245	16.34		0
TRUE	K6	Sample 246	16.52		0
TRUE	K7	Sample 247	16		0
TRUE	K8	Sample 248	16.11		0
TRUE	K9	Sample 249	16.32		0
TRUE	K10	Sample 250	16.26		0
TRUE	K11	Sample 251	16.52		0
TRUE	K12	Sample 252	16.46		0
TRUE	K13	Sample 253	16.87		0
TRUE	K14	Sample 254	16.91		0
TRUE	K15	Sample 255	17.11		0
TRUE	K16	Sample 256	17.49		0
TRUE	K17	Sample 257	16.57		0
TRUE	K18	Sample 258	16.58		0
TRUE	K19	Sample 259	16.24		0
TRUE	K20	Sample 260	16.44		0
TRUE	K21	Sample 261	16.73		0
TRUE	K22	Sample 262	16.71		0
TRUE	K23	Sample 263	16.43		0
TRUE	K24	Sample 264	16.52		0
TRUE	L1	Sample 265	24.05		0
TRUE	L2	Sample 266	23.98		0
TRUE	L3	Sample 267	25.71		0
TRUE	L4	Sample 268	25.68		0
TRUE	L5	Sample 269	25.34		0
TRUE	L6	Sample 270	25.51		0
TRUE	L7	Sample 271	23.87		0
TRUE	L8	Sample 272	24.04		0
TRUE	L9	Sample 273	24.13		0
TRUE	L10	Sample 274	23.91		0
TRUE	L11	Sample 275	23.9		0
TRUE	L12	Sample 276	23.88		0
TRUE	L13	Sample 277	23.88		0
TRUE	L14	Sample 278	23.96		0
TRUE	L15	Sample 279	24.02		0
TRUE	L16	Sample 280	23.94		0
TRUE	L17	Sample 281	24.07		0
TRUE	L18	Sample 282	24.15		0
TRUE	L19	Sample 283	23.75		0
TRUE	L20	Sample 284	23.71		0
TRUE	L21	Sample 285	23.98		0
TRUE	L22	Sample 286	23.99		0
TRUE	L23	Sample 287	24.28		0
TRUE	L24	Sample 288	24.17		0
TRUE	M1	Sample 289	16.24		0
TRUE	M2	Sample 290	16.14		0
TRUE	M3	Sample 291	18.11		0
TRUE	M4	Sample 292	18.1		0
TRUE	M5	Sample 293	20.48		0
TRUE	M6	Sample 294	20.53		0
TRUE	M7	Sample 295	22.82		0
TRUE	M8	Sample 296	22.82		0
TRUE	M9	Sample 297	25.07		0
TRUE	M10	Sample 298	25.3		0
TRUE	M11	Sample 299	39.48		0
TRUE	M12	Sample 300	40		0	> - Late Cp call (last five cycles) has higher uncertainty
TRUE	M13	Sample 301	24.12		0
TRUE	M14	Sample 302	24.07		0
TRUE	M15	Sample 303	26.21		0
TRUE	M16	Sample 304	26.12		0
TRUE	M17	Sample 305	28.46		0
TRUE	M18	Sample 306	28.81		0
TRUE	M19	Sample 307	31.7		0
TRUE	M20	Sample 308	31.83		0
TRUE	M21	Sample 309	32.88		0
TRUE	M22	Sample 310	33.98		0
TRUE	M23	Sample 311			0
TRUE	M24	Sample 312			0
TRUE	N1	Sample 313	25.72		0
TRUE	N2	Sample 314	25.67		0
TRUE	N3	Sample 315	27.55		0
TRUE	N4	Sample 316	27.69		0
TRUE	N5	Sample 317	29.78		0
TRUE	N6	Sample 318	30		0
TRUE	N7	Sample 319	31.85		0
TRUE	N8	Sample 320	31.43		0
TRUE	N9	Sample 321	36.22		0
TRUE	N10	Sample 322	33.78		0
TRUE	N11	Sample 323			0
TRUE	N12	Sample 324			0
TRUE	N13	Sample 325	23.58		0
TRUE	N14	Sample 326	23.34		0
TRUE	N15	Sample 327	25.33		0
TRUE	N16	Sample 328	25.54		0
TRUE	N17	Sample 329	27.81		0
TRUE	N18	Sample 330	27.73		0
TRUE	N19	Sample 331	30.56		0
TRUE	N20	Sample 332	29.95		0
TRUE	N21	Sample 333	32.15		0
TRUE	N22	Sample 334	31.83		0
TRUE	N23	Sample 335	40		0	> - Late Cp call (last five cycles) has higher uncertainty
TRUE	N24	Sample 336	40		0	> - Late Cp call (last five cycles) has higher uncertainty
TRUE	O1	Sample 337	23.92		0
TRUE	O2	Sample 338	23.78		0
TRUE	O3	Sample 339	25.52		0
TRUE	O4	Sample 340	25.63		0
TRUE	O5	Sample 341	27.75		0
TRUE	O6	Sample 342	27.59		0
TRUE	O7	Sample 343	30.03		0
TRUE	O8	Sample 344	30.03		0
TRUE	O9	Sample 345	32.33		0
TRUE	O10	Sample 346	32.26		0
TRUE	O11	Sample 347			0
TRUE	O12	Sample 348			0
TRUE	O13	Sample 349	14.17		0
TRUE	O14	Sample 350			0
TRUE	O15	Sample 351	16.17		0
TRUE	O16	Sample 352	29.01		0
TRUE	O17	Sample 353	18.48		0
TRUE	O18	Sample 354			0
TRUE	O19	Sample 355	20.84		0
TRUE	O20	Sample 356			0
TRUE	O21	Sample 357	23.23		0
TRUE	O22	Sample 358			0
TRUE	O23	Sample 359			0
TRUE	O24	Sample 360			0
TRUE	P1	Sample 361	15		0
TRUE	P2	Sample 362	15.29		0
TRUE	P3	Sample 363	17.28		0
TRUE	P4	Sample 364	17.45		0
TRUE	P5	Sample 365	19.7		0
TRUE	P6	Sample 366	19.7		0
TRUE	P7	Sample 367	21.94		0
TRUE	P8	Sample 368	21.97		0
TRUE	P9	Sample 369	24.35		0
TRUE	P10	Sample 370	24.46		0
TRUE	P11	Sample 371	40		0	> - Late Cp call (last five cycles) has higher uncertainty
TRUE	P12	Sample 372	40		0	> - Late Cp call (last five cycles) has higher uncertainty
TRUE	P13	Sample 373			0
TRUE	P14	Sample 374			0
TRUE	P15	Sample 375			0
TRUE	P16	Sample 376			0
TRUE	P17	Sample 377			0
TRUE	P18	Sample 378			0
TRUE	P19	Sample 379			0
TRUE	P20	Sample 380			0
TRUE	P21	Sample 381			0
TRUE	P22	Sample 382			0
TRUE	P23	Sample 383			0
TRUE	P24	Sample 384			0

## Sheet: Sheet2
aInclude	Pos	Name	Cp	Concentration	Standard	Status		actin	fog1	kdrl		actin	fog1	kdrl		actin	fog1	kdrl		actin	fog1	kdrl			fog1	kdrl
							29hpf, atoh8 WT																	To actin						fog1	kdrl
TRUE	A1	Sample 1	25.55		0		1	24.54	29.2	24.34		-0.743838	-1.4656	-0.984831		0.30205	0.0945338	0.204943		0.310856	0.105525	0.212937			0.339467	0.685001		WT	mean	0.426112	0.69537
																													SD	0.199375	0.082234
TRUE	A2	Sample 2	25.52		0			24.46	28.98	24.24		-0.708627	-1.3357	-0.938156		0.319662	0.116517	0.220931
																												null	mean	0.572803	0.718605
TRUE	A3	Sample 3	24.98		0		2	24.07	29.03	23.99		-0.536972	-1.36522	-0.82147		0.421379	0.11111	0.266573		0.421379	0.116071	0.278055			0.275454	0.659869			SD	0.103118	0.0628968
TRUE	A4	Sample 4	24.91		0			24.07	28.94	23.88		-0.536972	-1.31208	-0.770128		0.421379	0.121032	0.289537										To WT average		fog1	kdrl
TRUE	A5	Sample 5	25.47		0		3	25.11	29.79	25.06		-0.994718	-1.81399	-1.32089		0.201707	0.05396	0.119327		0.200995	0.055273	0.125944			0.274996	0.6266		WT	mean	1	1
																													SD	0.467894	0.118259
TRUE	A6	Sample 6	25.45		0			25.12	29.74	24.92		-0.99912	-1.78447	-1.25554		0.200284	0.056586	0.13256
																												null	mean	1.34425	1.03341
TRUE	A7	Sample 7	25.03		0		4	24.65	29.34	24.52		-0.792254	-1.54827	-1.06884		0.279408	0.0827568	0.179023		0.279408	0.0928661	0.179698			0.332367	0.64314			SD	0.241998	0.0904509
TRUE	A8	Sample 8	25.13		0			24.65	29.11	24.51		-0.792254	-1.41246	-1.06418		0.279408	0.102975	0.180373
TRUE	A9	Sample 9	25.33		0		5	24.64	28.79	24.21		-0.787852	-1.2235	-0.924154		0.281394	0.139575	0.225966		0.278436	0.157455	0.237557			0.565498	0.853183
TRUE	A10	Sample 10	25.31		0			24.67	28.55	24.08		-0.801056	-1.08178	-0.863477		0.275477	0.175334	0.249147
TRUE	A11	Sample 11	25.59		0		6	24.73	28.57	24.5		-0.827465	-1.09359	-1.05951		0.264014	0.172033	0.181733		0.264952	0.203719	0.186639			0.768887	0.704425
TRUE	A12	Sample 12	25.5		0			24.72	28.24	24.43		-0.823063	-0.89873	-1.02684		0.265891	0.235404	0.191545
							29hpf, atoh8 sa1465
TRUE	A13	Sample 13	26.19		0		1	24.63	28.77	24.14		-0.783451	-1.21169	-0.891482		0.283395	0.142254	0.238167		0.293796	0.159631	0.246496			0.543339	0.839003
TRUE	A14	Sample 14	26.31		0			24.53	28.54	24.05		-0.739437	-1.07588	-0.849475		0.304198	0.177008	0.254825
TRUE	A15	Sample 15	25.18		0		2	24.28	28.48	24		-0.629401	-1.04045	-0.826138		0.363134	0.187395	0.264578		0.368353	0.180535	0.263588			0.490115	0.715587
TRUE	A16	Sample 16	25.16		0			24.24	28.56	24.01		-0.611796	-1.08769	-0.830805		0.373571	0.173676	0.262598
TRUE	A17	Sample 17	25.68		0		3	24.71	29.02	24.5		-0.818662	-1.35932	-1.05951		0.267781	0.112171	0.181733		0.270657	0.132105	0.181733			0.48809	0.671453
TRUE	A18	Sample 18	25.72		0			24.68	28.7	24.5		-0.805458	-1.17036	-1.05951		0.273533	0.152039	0.181733
TRUE	A19	Sample 19	25.3		0		4	24.77	28.86	24.59		-0.84507	-1.26484	-1.10152		0.256638	0.130592	0.169853		0.258469	0.131845	0.171788			0.510101	0.664638
TRUE	A20	Sample 20	25.31		0			24.75	28.84	24.56		-0.836268	-1.25303	-1.08751		0.2603	0.133098	0.173724
TRUE	A21	Sample 21	25.56		0		5	25.11	28.91	24.7		-0.994718	-1.29436	-1.15286		0.201707	0.124532	0.156382		0.217884	0.149104	0.155216			0.684327	0.712379
TRUE	A22	Sample 22	25.54		0			24.9	28.56	24.72		-0.902289	-1.08769	-1.16219		0.23406	0.173676	0.15405
TRUE	A23	Sample 23	25.72		0		6	24.91	28.73	24.82		-0.90669	-1.18807	-1.20887		0.232408	0.147766	0.142902		0.220694	0.159086	0.156377			0.720843	0.708571
TRUE	A24	Sample 24	25.81		0			25.06	28.58	24.59		-0.972711	-1.0995	-1.10152		0.20898	0.170406	0.169853
							Standards, serial 5x
TRUE	B1	Sample 25	25.11		0		-1	25.11	29.1	24.51
TRUE	B2	Sample 26	25.21		0		-1	25.21	28.85	24.27
TRUE	B3	Sample 27	27.42		0		-2	27.42	29.27	26.44
TRUE	B4	Sample 28	27.27		0		-2	27.27	29.48	26.48
TRUE	B5	Sample 29	29.63		0		-3	29.63	31.54	28.66
TRUE	B6	Sample 30	29.67		0		-3	29.67	31.59	28.77
TRUE	B7	Sample 31	31.49		0		-4	31.49	34.11	30.71
TRUE	B8	Sample 32	32.44		0		-4	32.44	33.67	30.85
TRUE	B9	Sample 33	34.9		0		-5	34.9	36.91	33.08
TRUE	B10	Sample 34	34.23		0		-5	34.23	36.69	33.09
TRUE	B11	Sample 35			0		NTC	0	0	40
TRUE	B12	Sample 36			0			0	0	40
TRUE	B13	Sample 37			0		gradient	-2.272	-1.6935	-2.1425
TRUE	B14	Sample 38			0		intercept	22.85	26.718	22.23
TRUE	B15	Sample 39			0
TRUE	B16	Sample 40			0
TRUE	B17	Sample 41			0
TRUE	B18	Sample 42			0
TRUE	B19	Sample 43			0
TRUE	B20	Sample 44			0
TRUE	B21	Sample 45			0
TRUE	B22	Sample 46			0
TRUE	B23	Sample 47			0
TRUE	B24	Sample 48			0
TRUE	C1	Sample 49	25.85		0
TRUE	C2	Sample 50	26.04		0
TRUE	C3	Sample 51	25.52		0
TRUE	C4	Sample 52	25.51		0
TRUE	C5	Sample 53	25.57		0
TRUE	C6	Sample 54	25.78		0
TRUE	C7	Sample 55	25.87		0
TRUE	C8	Sample 56	25.91		0
TRUE	C9	Sample 57	25.97		0
TRUE	C10	Sample 58	25.99		0
TRUE	C11	Sample 59	25.53		0
TRUE	C12	Sample 60	25.59		0
TRUE	C13	Sample 61	26.88		0
TRUE	C14	Sample 62	26.7		0
TRUE	C15	Sample 63	25.98		0
TRUE	C16	Sample 64	25.86		0
TRUE	C17	Sample 65	26.47		0
TRUE	C18	Sample 66	26.31		0
TRUE	C19	Sample 67	26.2		0
TRUE	C20	Sample 68	26.23		0
TRUE	C21	Sample 69	26.03		0
TRUE	C22	Sample 70	25.96		0
TRUE	C23	Sample 71	26.25		0
TRUE	C24	Sample 72	26.14		0
TRUE	D1	Sample 73	25.78		0
TRUE	D2	Sample 74	25.79		0
TRUE	D3	Sample 75	27.73		0
TRUE	D4	Sample 76	27.91		0
TRUE	D5	Sample 77	30.05		0
TRUE	D6	Sample 78	29.97		0
TRUE	D7	Sample 79	32.56		0
TRUE	D8	Sample 80	31.72		0
TRUE	D9	Sample 81	34.67		0
TRUE	D10	Sample 82	33.47		0
TRUE	D11	Sample 83	40		0	> - Late Cp call (last five cycles) has higher uncertainty
TRUE	D12	Sample 84	40		0	> - Late Cp call (last five cycles) has higher uncertainty
TRUE	D13	Sample 85			0
TRUE	D14	Sample 86			0
TRUE	D15	Sample 87			0
TRUE	D16	Sample 88			0
TRUE	D17	Sample 89			0
TRUE	D18	Sample 90			0
TRUE	D19	Sample 91			0
TRUE	D20	Sample 92			0
TRUE	D21	Sample 93			0
TRUE	D22	Sample 94			0
TRUE	D23	Sample 95			0
TRUE	D24	Sample 96			0
TRUE	E1	Sample 97	28.13		0
TRUE	E2	Sample 98	27.95		0
TRUE	E3	Sample 99	27.98		0
TRUE	E4	Sample 100	27.72		0
TRUE	E5	Sample 101	27.54		0
TRUE	E6	Sample 102	27.56		0
TRUE	E7	Sample 103	27.61		0
TRUE	E8	Sample 104	27.57		0
TRUE	E9	Sample 105	27.59		0
TRUE	E10	Sample 106	27.43		0
TRUE	E11	Sample 107	27.28		0
TRUE	E12	Sample 108	27.15		0
TRUE	E13	Sample 109	28.13		0
TRUE	E14	Sample 110	28.17		0
TRUE	E15	Sample 111	26.99		0
TRUE	E16	Sample 112	26.88		0
TRUE	E17	Sample 113	27.53		0
TRUE	E18	Sample 114	27.57		0
TRUE	E19	Sample 115	27.66		0
TRUE	E20	Sample 116	27.26		0
TRUE	E21	Sample 117	27.17		0
TRUE	E22	Sample 118	27.13		0
TRUE	E23	Sample 119	27.44		0
TRUE	E24	Sample 120	27.3		0
TRUE	F1	Sample 121	29.1		0
TRUE	F2	Sample 122	28.85		0
TRUE	F3	Sample 123	29.27		0
TRUE	F4	Sample 124	29.48		0
TRUE	F5	Sample 125	31.54		0
TRUE	F6	Sample 126	31.59		0
TRUE	F7	Sample 127	34.11		0
TRUE	F8	Sample 128	33.67		0
TRUE	F9	Sample 129	36.91		0
TRUE	F10	Sample 130	36.69		0
TRUE	F11	Sample 131			0
TRUE	F12	Sample 132			0
TRUE	F13	Sample 133			0
TRUE	F14	Sample 134			0
TRUE	F15	Sample 135			0
TRUE	F16	Sample 136			0
TRUE	F17	Sample 137			0
TRUE	F18	Sample 138			0
TRUE	F19	Sample 139			0
TRUE	F20	Sample 140			0
TRUE	F21	Sample 141			0
TRUE	F22	Sample 142			0
TRUE	F23	Sample 143			0
TRUE	F24	Sample 144			0
TRUE	G1	Sample 145	25.03		0
TRUE	G2	Sample 146	24.88		0
TRUE	G3	Sample 147	24.9		0
TRUE	G4	Sample 148	24.89		0
TRUE	G5	Sample 149	24.93		0
TRUE	G6	Sample 150	24.79		0
TRUE	G7	Sample 151	25.24		0
TRUE	G8	Sample 152	25.14		0
TRUE	G9	Sample 153	25.2		0
TRUE	G10	Sample 154	25.16		0
TRUE	G11	Sample 155	25.15		0
TRUE	G12	Sample 156	25.12		0
TRUE	G13	Sample 157	25.8		0
TRUE	G14	Sample 158	25.77		0
TRUE	G15	Sample 159	25.23		0
TRUE	G16	Sample 160	25.2		0
TRUE	G17	Sample 161	25.19		0
TRUE	G18	Sample 162	25.24		0
TRUE	G19	Sample 163	25.32		0
TRUE	G20	Sample 164	25.25		0
TRUE	G21	Sample 165	25.52		0
TRUE	G22	Sample 166	25.43		0
TRUE	G23	Sample 167	25.33		0
TRUE	G24	Sample 168	25.33		0
TRUE	H1	Sample 169	24.78		0
TRUE	H2	Sample 170	24.88		0
TRUE	H3	Sample 171	26.82		0
TRUE	H4	Sample 172	26.94		0
TRUE	H5	Sample 173	29.22		0
TRUE	H6	Sample 174	29.11		0
TRUE	H7	Sample 175	31.05		0
TRUE	H8	Sample 176	31.26		0
TRUE	H9	Sample 177	33.92		0
TRUE	H10	Sample 178	33		0
TRUE	H11	Sample 179			0
TRUE	H12	Sample 180			0
TRUE	H13	Sample 181			0
TRUE	H14	Sample 182			0
TRUE	H15	Sample 183			0
TRUE	H16	Sample 184			0
TRUE	H17	Sample 185			0
TRUE	H18	Sample 186			0
TRUE	H19	Sample 187			0
TRUE	H20	Sample 188			0
TRUE	H21	Sample 189			0
TRUE	H22	Sample 190			0
TRUE	H23	Sample 191			0
TRUE	H24	Sample 192			0
TRUE	I1	Sample 193	25.78		0
TRUE	I2	Sample 194	25.51		0
TRUE	I3	Sample 195	25.42		0
TRUE	I4	Sample 196	25.2		0
TRUE	I5	Sample 197	26.69		0
TRUE	I6	Sample 198	26.74		0
TRUE	I7	Sample 199	25.42		0
TRUE	I8	Sample 200	25.32		0
TRUE	I9	Sample 201	25.14		0
TRUE	I10	Sample 202	25.23		0
TRUE	I11	Sample 203	25.13		0
TRUE	I12	Sample 204	25.17		0
TRUE	I13	Sample 205	27.32		0
TRUE	I14	Sample 206	27.46		0
TRUE	I15	Sample 207	26.62		0
TRUE	I16	Sample 208	26.75		0
TRUE	I17	Sample 209	25.93		0
TRUE	I18	Sample 210	25.89		0
TRUE	I19	Sample 211	26.87		0
TRUE	I20	Sample 212	26.74		0
TRUE	I21	Sample 213	26.74		0
TRUE	I22	Sample 214	26.76		0
TRUE	I23	Sample 215	27		0
TRUE	I24	Sample 216	26.81		0
TRUE	J1	Sample 217	24.79		0
TRUE	J2	Sample 218	24.77		0
TRUE	J3	Sample 219	27.49		0
TRUE	J4	Sample 220	27.55		0
TRUE	J5	Sample 221	29.89		0
TRUE	J6	Sample 222	29.83		0
TRUE	J7	Sample 223	32.77		0
TRUE	J8	Sample 224	32.58		0
TRUE	J9	Sample 225	35.82		0
TRUE	J10	Sample 226	35.29		0
TRUE	J11	Sample 227			0
TRUE	J12	Sample 228			0
TRUE	J13	Sample 229			0
TRUE	J14	Sample 230			0
TRUE	J15	Sample 231			0
TRUE	J16	Sample 232			0
TRUE	J17	Sample 233			0
TRUE	J18	Sample 234			0
TRUE	J19	Sample 235			0
TRUE	J20	Sample 236			0
TRUE	J21	Sample 237			0
TRUE	J22	Sample 238			0
TRUE	J23	Sample 239			0
TRUE	J24	Sample 240			0
TRUE	K1	Sample 241	24.54		0
TRUE	K2	Sample 242	24.46		0
TRUE	K3	Sample 243	24.07		0
TRUE	K4	Sample 244	24.07		0
TRUE	K5	Sample 245	25.11		0
TRUE	K6	Sample 246	25.12		0
TRUE	K7	Sample 247	24.65		0
TRUE	K8	Sample 248	24.65		0
TRUE	K9	Sample 249	24.64		0
TRUE	K10	Sample 250	24.67		0
TRUE	K11	Sample 251	24.73		0
TRUE	K12	Sample 252	24.72		0
TRUE	K13	Sample 253	24.63		0
TRUE	K14	Sample 254	24.53		0
TRUE	K15	Sample 255	24.28		0
TRUE	K16	Sample 256	24.24		0
TRUE	K17	Sample 257	24.71		0
TRUE	K18	Sample 258	24.68		0
TRUE	K19	Sample 259	24.77		0
TRUE	K20	Sample 260	24.75		0
TRUE	K21	Sample 261	25.11		0
TRUE	K22	Sample 262	24.9		0
TRUE	K23	Sample 263	24.91		0
TRUE	K24	Sample 264	25.06		0
TRUE	L1	Sample 265	40		0	> - Late Cp call (last five cycles) has higher uncertainty
TRUE	L2	Sample 266			0
TRUE	L3	Sample 267			0
TRUE	L4	Sample 268			0
TRUE	L5	Sample 269			0
TRUE	L6	Sample 270			0
TRUE	L7	Sample 271			0
TRUE	L8	Sample 272			0
TRUE	L9	Sample 273			0
TRUE	L10	Sample 274			0
TRUE	L11	Sample 275			0
TRUE	L12	Sample 276			0
TRUE	L13	Sample 277			0
TRUE	L14	Sample 278			0
TRUE	L15	Sample 279			0
TRUE	L16	Sample 280			0
TRUE	L17	Sample 281			0
TRUE	L18	Sample 282			0
TRUE	L19	Sample 283			0
TRUE	L20	Sample 284			0
TRUE	L21	Sample 285			0
TRUE	L22	Sample 286			0
TRUE	L23	Sample 287			0
TRUE	L24	Sample 288			0
TRUE	M1	Sample 289	29.2		0
TRUE	M2	Sample 290	28.98		0
TRUE	M3	Sample 291	29.03		0
TRUE	M4	Sample 292	28.94		0
TRUE	M5	Sample 293	29.79		0
TRUE	M6	Sample 294	29.74		0
TRUE	M7	Sample 295	29.34		0
TRUE	M8	Sample 296	29.11		0
TRUE	M9	Sample 297	28.79		0
TRUE	M10	Sample 298	28.55		0
TRUE	M11	Sample 299	28.57		0
TRUE	M12	Sample 300	28.24		0
TRUE	M13	Sample 301	28.77		0
TRUE	M14	Sample 302	28.54		0
TRUE	M15	Sample 303	28.48		0
TRUE	M16	Sample 304	28.56		0
TRUE	M17	Sample 305	29.02		0
TRUE	M18	Sample 306	28.7		0
TRUE	M19	Sample 307	28.86		0
TRUE	M20	Sample 308	28.84		0
TRUE	M21	Sample 309	28.91		0
TRUE	M22	Sample 310	28.56		0
TRUE	M23	Sample 311	28.73		0
TRUE	M24	Sample 312	28.58		0
TRUE	N1	Sample 313			0
TRUE	N2	Sample 314			0
TRUE	N3	Sample 315			0
TRUE	N4	Sample 316			0
TRUE	N5	Sample 317			0
TRUE	N6	Sample 318			0
TRUE	N7	Sample 319			0
TRUE	N8	Sample 320			0
TRUE	N9	Sample 321			0
TRUE	N10	Sample 322			0
TRUE	N11	Sample 323			0
TRUE	N12	Sample 324			0
TRUE	N13	Sample 325			0
TRUE	N14	Sample 326			0
TRUE	N15	Sample 327			0
TRUE	N16	Sample 328			0
TRUE	N17	Sample 329			0
TRUE	N18	Sample 330			0
TRUE	N19	Sample 331			0
TRUE	N20	Sample 332			0
TRUE	N21	Sample 333			0
TRUE	N22	Sample 334			0
TRUE	N23	Sample 335			0
TRUE	N24	Sample 336			0
TRUE	O1	Sample 337	24.34		0
TRUE	O2	Sample 338	24.24		0
TRUE	O3	Sample 339	23.99		0
TRUE	O4	Sample 340	23.88		0
TRUE	O5	Sample 341	25.06		0
TRUE	O6	Sample 342	24.92		0
TRUE	O7	Sample 343	24.52		0
TRUE	O8	Sample 344	24.51		0
TRUE	O9	Sample 345	24.21		0
TRUE	O10	Sample 346	24.08		0
TRUE	O11	Sample 347	24.5		0
TRUE	O12	Sample 348	24.43		0
TRUE	O13	Sample 349	24.14		0
TRUE	O14	Sample 350	24.05		0
TRUE	O15	Sample 351	24		0
TRUE	O16	Sample 352	24.01		0
TRUE	O17	Sample 353	24.5		0
TRUE	O18	Sample 354	24.5		0
TRUE	O19	Sample 355	24.59		0
TRUE	O20	Sample 356	24.56		0
TRUE	O21	Sample 357	24.7		0
TRUE	O22	Sample 358	24.72		0
TRUE	O23	Sample 359	24.82		0
TRUE	O24	Sample 360	24.59		0
TRUE	P1	Sample 361	24.51		0
TRUE	P2	Sample 362	24.27		0
TRUE	P3	Sample 363	26.44		0
TRUE	P4	Sample 364	26.48		0
TRUE	P5	Sample 365	28.66		0
TRUE	P6	Sample 366	28.77		0
TRUE	P7	Sample 367	30.71		0
TRUE	P8	Sample 368	30.85		0
TRUE	P9	Sample 369	33.08		0
TRUE	P10	Sample 370	33.09		0
TRUE	P11	Sample 371	40		0	> - Late Cp call (last five cycles) has higher uncertainty
TRUE	P12	Sample 372	40		0	> - Late Cp call (last five cycles) has higher uncertainty
TRUE	P13	Sample 373			0
TRUE	P14	Sample 374			0
TRUE	P15	Sample 375			0
TRUE	P16	Sample 376			0
TRUE	P17	Sample 377			0
TRUE	P18	Sample 378			0
TRUE	P19	Sample 379			0
TRUE	P20	Sample 380			0
TRUE	P21	Sample 381			0
TRUE	P22	Sample 382			0
TRUE	P23	Sample 383			0
TRUE	P24	Sample 384			0

## Sheet: 29hpf
aInclude	Pos	Name	Cp	Concentration	Standard	Status		actin	atoh8		actin	atoh8		actin	atoh8		actin	atoh8		atoh8		Include	Pos	Name	Cp	Concentration	Standard	Status		Actin	atoh8		Actin	atoh8		Actin	atoh8		Actin	atoh8			atoh8			29 hpf	72 hpf
							29hpf, atoh8 WT												To actin										72hpf, atoh8 WT													To actin
TRUE	A1	Sample 1	25.55		0		1	25.55	25.78		-1.18838	-1.37445		0.147692	0.109472		0.149278	0.119419		0.799972		TRUE	A1	Sample 1	16.45		0		1	16.45	24.54		-0.96293	-0.747951		0.212296	0.300058		0.210018	0.279792		1	1.8743		atoh8 WT	0.753642	1.90574
																																													SD	0.24004	0.313861
TRUE	A2	Sample 2	25.52		0			25.52	25.51		-1.17518	-1.2707		0.150865	0.129365							TRUE	A2	Sample 2	16.48		0			16.48	24.76		-0.97641	-0.838115		0.207739	0.259527
TRUE	A3	Sample 3	24.98		0		2	24.98	25.42		-0.9375	-1.23612		0.221165	0.13677		0.226786	0.146736		0.647024		TRUE	A3	Sample 3	16.06		0		2	16.06	24.02		-0.787688	-0.534836		0.281468	0.42283		0.266091	0.408034		2	1.7992		atoh8 null	0.450467	1.68169
																																													SD	0.160513	0.487288
TRUE	A4	Sample 4	24.91		0			24.91	25.2		-0.90669	-1.15159		0.232408	0.156703							TRUE	A4	Sample 4	16.22		0			16.22	24.13		-0.859582	-0.579918		0.250714	0.393237
TRUE	A5	Sample 5	25.47		0		3	25.47	26.69		-1.15317	-1.72411		0.156304	0.0623588		0.157419	0.0614095		0.390102		TRUE	A5	Sample 5	16.17		0		3	16.17	24.22		-0.837115	-0.616803		0.259945	0.370572		0.270707	0.373033		3	2.36968
																																													To WT
TRUE	A6	Sample 6	25.45		0			25.45	26.74		-1.14437	-1.74332		0.158534	0.0604601							TRUE	A6	Sample 6	16.06		0			16.06	24.2		-0.787688	-0.608607		0.281468	0.375493									29 hpf	72 hpf
TRUE	A7	Sample 7	25.03		0		4	25.03	25.42		-0.959507	-1.23612		0.213468	0.13677		0.206169	0.141132		0.684546		TRUE	A7	Sample 7	16.3		0		4	16.3	24.45		-0.895529	-0.711066		0.23662	0.31841		0.237479	0.310227		4	1.50472		atoh8 WT	1	1
																																													SD	0.318506	0.164692
TRUE	A8	Sample 8	25.13		0			25.13	25.32		-1.00352	-1.19769		0.19887	0.145495							TRUE	A8	Sample 8	16.29		0			16.29	24.53		-0.891036	-0.743852		0.238338	0.302043
TRUE	A9	Sample 9	25.33		0		5	25.33	25.14		-1.09155	-1.12853		0.1726	0.162626		0.173831	0.158224		0.91022		TRUE	A9	Sample 9	16.15		0		5	16.15	24.23		-0.828129	-0.620902		0.263732	0.368136		0.259049	0.344327		5	1.98081		atoh8 null	0.597721	0.882433
																																													SD	0.212983	0.255695
TRUE	A10	Sample 10	25.31		0			25.31	25.23		-1.08275	-1.16311		0.175062	0.153822							TRUE	A10	Sample 10	16.2		0			16.2	24.44		-0.850595	-0.706967		0.254366	0.320517
																													72hpf, atoh8 sa1465
TRUE	A11	Sample 11	25.59		0		6	25.59	25.13		-1.20599	-1.12469		0.143566	0.163635		0.148292	0.161636		1.08999		TRUE	A11	Sample 11	16.14		0		1	16.14	24.77		-0.823635	-0.842213		0.265646	0.257821		0.215832	0.256132		1	1.72722
TRUE	A12	Sample 12	25.5		0			25.5	25.17		-1.16637	-1.14006		0.153017	0.159637							TRUE	A12	Sample 12	16.79		0			16.79	24.79		-1.1157	-0.85041		0.166018	0.254442
							29hpf, atoh8 sa1465
TRUE	A13	Sample 13	26.19		0		1	26.19	27.32		-1.47007	-1.96619		0.0938566	0.0422372		0.0900323	0.0404857		0.449679		TRUE	A13	Sample 13	16.69		0		2	16.69	24.87		-1.07077	-0.883197		0.178469	0.241364		0.193104	0.239782		2	2.66329
TRUE	A14	Sample 14	26.31		0			26.31	27.46		-1.52289	-2.01998		0.086208	0.0387341							TRUE	A14	Sample 14	16.48		0			16.48	24.89		-0.97641	-0.891393		0.207739	0.238201
TRUE	A15	Sample 15	25.18		0		2	25.18	26.62		-1.02553	-1.69721		0.191949	0.0651176		0.193319	0.0626025		0.32383		TRUE	A15	Sample 15	16.5		0		3	16.5	24.71		-0.985397	-0.817623		0.204756	0.268229		0.19557	0.268229		3	1.3875
TRUE	A16	Sample 16	25.16		0			25.16	26.75		-1.01673	-1.74717		0.194688	0.0600874							TRUE	A16	Sample 16	16.63		0			16.63	24.71		-1.04381	-0.817623		0.186384	0.268229
TRUE	A17	Sample 17	25.68		0		3	25.68	25.93		-1.2456	-1.43208		0.134699	0.0997737		0.132817	0.101023		0.760617		TRUE	A17	Sample 17	16.6		0		4	16.6	25.04		-1.03033	-0.952869		0.190472	0.215761		0.19256	0.215052		4	1.61916
TRUE	A18	Sample 18	25.72		0			25.72	25.89		-1.2632	-1.41671		0.130936	0.102273							TRUE	A18	Sample 18	16.57		0			16.57	25.05		-1.01685	-0.956967		0.194649	0.214343
TRUE	A19	Sample 19	25.3		0		4	25.3	26.87		-1.07835	-1.79328		0.176307	0.0557897		0.175685	0.0581249		0.330848		TRUE	A19	Sample 19	17.18		0		5	17.18	25.13		-1.29095	-0.989754		0.125218	0.203325		0.114487	0.206734		5	1.17673
TRUE	A20	Sample 20	25.31		0			25.31	26.74		-1.08275	-1.74332		0.175062	0.0604601							TRUE	A20	Sample 20	17.44		0			17.44	25.08		-1.40777	-0.969262		0.103755	0.210143
TRUE	A21	Sample 21	25.56		0		5	25.56	26.74		-1.19278	-1.74332		0.14665	0.0604601		0.147696	0.0600885		0.406839		TRUE	A21	Sample 21	16.26		0		6	16.26	25.03		-0.877556	-0.94877		0.243565	0.217189		0.221963	0.203142		6	1.37541
TRUE	A22	Sample 22	25.54		0			25.54	26.76		-1.18398	-1.75101		0.148742	0.0597169							TRUE	A22	Sample 22	16.53		0			16.53	25.24		-0.998877	-1.03484		0.200362	0.189095
TRUE	A23	Sample 23	25.72		0		6	25.72	27		-1.2632	-1.84323		0.130936	0.0514801		0.126892	0.0546894		0.430991		TRUE	A23	Sample 23	16.21		0		7	16.21	24.96		-0.855089	-0.920082		0.252533	0.227452		0.207494	0.231266		7	1.82254
TRUE	A24	Sample 24	25.81		0			25.81	26.81		-1.30282	-1.77022		0.122849	0.0578987							TRUE	A24	Sample 24	16.82		0			16.82	24.91		-1.12918	-0.89959		0.162455	0.235079
							Standards, serial 5x																						Standards, serial 5x
TRUE	B1	Sample 25	25.11		0		-1	25.11	24.79													TRUE	B1	Sample 25	16.64		0		-1	16.64	24.81
TRUE	B2	Sample 26	25.21		0			25.21	24.77													TRUE	B2	Sample 26	16.64		0		-1	16.64	25.47
TRUE	B3	Sample 27	27.42		0		-2	27.42	27.49													TRUE	B3	Sample 27	18.7		0		-2	18.7	27.53
TRUE	B4	Sample 28	27.27		0			27.27	27.55													TRUE	B4	Sample 28	18.67		0		-2	18.67	27.52
TRUE	B5	Sample 29	29.63		0		-3	29.63	29.89													TRUE	B5	Sample 29	20.89		0		-3	20.89	30.21
TRUE	B6	Sample 30	29.67		0			29.67	29.83													TRUE	B6	Sample 30	20.88		0		-3	20.88	30.23
TRUE	B7	Sample 31	31.49		0		-4	31.49	32.77													TRUE	B7	Sample 31	23.21		0		-4	23.21	32.32
TRUE	B8	Sample 32	32.44		0			32.44	32.58													TRUE	B8	Sample 32	23.17		0		-4	23.17	32.43
TRUE	B9	Sample 33	34.9		0		-5	34.9	35.82													TRUE	B9	Sample 33	25.54		0		-5	25.54	35.66
TRUE	B10	Sample 34	34.23		0			34.23	35.29													TRUE	B10	Sample 34	25.49		0		-5	25.49	35.08
TRUE	B11	Sample 35			0		NTC	0	0													TRUE	B11	Sample 35	37.96		0		NTC	37.96	0
TRUE	B12	Sample 36			0			0	0													TRUE	B12	Sample 36			0
TRUE	B13	Sample 37			0		gradient	-2.272	-2.6025													TRUE	B13	Sample 37			0		intercept	14.307	22.715
																													gradient	-2.2255	-2.44
TRUE	B14	Sample 38			0		intercept	22.85	22.203													TRUE	B14	Sample 38			0
TRUE	B15	Sample 39			0																	TRUE	B15	Sample 39			0
TRUE	B16	Sample 40			0																	TRUE	B16	Sample 40			0
TRUE	B17	Sample 41			0																	TRUE	B17	Sample 41			0
TRUE	B18	Sample 42			0																	TRUE	B18	Sample 42			0
TRUE	B19	Sample 43			0																	TRUE	B19	Sample 43			0
TRUE	B20	Sample 44			0																	TRUE	B20	Sample 44			0
TRUE	B21	Sample 45			0																	TRUE	B21	Sample 45			0
TRUE	B22	Sample 46			0																	TRUE	B22	Sample 46			0
TRUE	B23	Sample 47			0																	TRUE	B23	Sample 47			0
TRUE	B24	Sample 48			0																	TRUE	B24	Sample 48			0
TRUE	C1	Sample 49	25.85		0																	TRUE	C1	Sample 49	26.33		0
TRUE	C2	Sample 50	26.04		0																	TRUE	C2	Sample 50	26.16		0
TRUE	C3	Sample 51	25.52		0																	TRUE	C3	Sample 51	25.85		0
TRUE	C4	Sample 52	25.51		0																	TRUE	C4	Sample 52	25.79		0
TRUE	C5	Sample 53	25.57		0																	TRUE	C5	Sample 53	25.83		0
TRUE	C6	Sample 54	25.78		0																	TRUE	C6	Sample 54	25.83		0
TRUE	C7	Sample 55	25.87		0																	TRUE	C7	Sample 55	25.98		0
TRUE	C8	Sample 56	25.91		0																	TRUE	C8	Sample 56	26.05		0
TRUE	C9	Sample 57	25.97		0																	TRUE	C9	Sample 57	26.01		0
TRUE	C10	Sample 58	25.99		0																	TRUE	C10	Sample 58	25.97		0
TRUE	C11	Sample 59	25.53		0																	TRUE	C11	Sample 59	25.16		0
TRUE	C12	Sample 60	25.59		0																	TRUE	C12	Sample 60	25.07		0
TRUE	C13	Sample 61	26.88		0																	TRUE	C13	Sample 61	25.27		0
TRUE	C14	Sample 62	26.7		0																	TRUE	C14	Sample 62	25.09		0
TRUE	C15	Sample 63	25.98		0																	TRUE	C15	Sample 63	25.04		0
TRUE	C16	Sample 64	25.86		0																	TRUE	C16	Sample 64	25		0
TRUE	C17	Sample 65	26.47		0																	TRUE	C17	Sample 65	25.62		0
TRUE	C18	Sample 66	26.31		0																	TRUE	C18	Sample 66	25.51		0
TRUE	C19	Sample 67	26.2		0																	TRUE	C19	Sample 67	25.43		0
TRUE	C20	Sample 68	26.23		0																	TRUE	C20	Sample 68	25.16		0
TRUE	C21	Sample 69	26.03		0																	TRUE	C21	Sample 69	25.32		0
TRUE	C22	Sample 70	25.96		0																	TRUE	C22	Sample 70	25.3		0
TRUE	C23	Sample 71	26.25		0																	TRUE	C23	Sample 71	25.3		0
TRUE	C24	Sample 72	26.14		0																	TRUE	C24	Sample 72	25.42		0
TRUE	D1	Sample 73	25.78		0																	TRUE	D1	Sample 73	26.11		0
TRUE	D2	Sample 74	25.79		0																	TRUE	D2	Sample 74	26.04		0
TRUE	D3	Sample 75	27.73		0																	TRUE	D3	Sample 75	28.22		0
TRUE	D4	Sample 76	27.91		0																	TRUE	D4	Sample 76	28.28		0
TRUE	D5	Sample 77	30.05		0																	TRUE	D5	Sample 77	31.15		0
TRUE	D6	Sample 78	29.97		0																	TRUE	D6	Sample 78	30.31		0
TRUE	D7	Sample 79	32.56		0																	TRUE	D7	Sample 79	32.28		0
TRUE	D8	Sample 80	31.72		0																	TRUE	D8	Sample 80	32.48		0
TRUE	D9	Sample 81	34.67		0																	TRUE	D9	Sample 81	40		0	> - Late Cp call (last five cycles) has higher uncertainty
TRUE	D10	Sample 82	33.47		0																	TRUE	D10	Sample 82	40		0	> - Late Cp call (last five cycles) has higher uncertainty
TRUE	D11	Sample 83	40		0	> - Late Cp call (last five cycles) has higher uncertainty																TRUE	D11	Sample 83			0
TRUE	D12	Sample 84	40		0	> - Late Cp call (last five cycles) has higher uncertainty																TRUE	D12	Sample 84			0
TRUE	D13	Sample 85			0																	TRUE	D13	Sample 85			0
TRUE	D14	Sample 86			0																	TRUE	D14	Sample 86			0
TRUE	D15	Sample 87			0																	TRUE	D15	Sample 87			0
TRUE	D16	Sample 88			0																	TRUE	D16	Sample 88			0
TRUE	D17	Sample 89			0																	TRUE	D17	Sample 89			0
TRUE	D18	Sample 90			0																	TRUE	D18	Sample 90			0
TRUE	D19	Sample 91			0																	TRUE	D19	Sample 91			0
TRUE	D20	Sample 92			0																	TRUE	D20	Sample 92			0
TRUE	D21	Sample 93			0																	TRUE	D21	Sample 93			0
TRUE	D22	Sample 94			0																	TRUE	D22	Sample 94			0
TRUE	D23	Sample 95			0																	TRUE	D23	Sample 95			0
TRUE	D24	Sample 96			0																	TRUE	D24	Sample 96			0
TRUE	E1	Sample 97	28.13		0																	TRUE	E1	Sample 97	23.94		0
TRUE	E2	Sample 98	27.95		0																	TRUE	E2	Sample 98	24.03		0
TRUE	E3	Sample 99	27.98		0																	TRUE	E3	Sample 99	23.66		0
TRUE	E4	Sample 100	27.72		0																	TRUE	E4	Sample 100	23.77		0
TRUE	E5	Sample 101	27.54		0																	TRUE	E5	Sample 101	23.3		0
TRUE	E6	Sample 102	27.56		0																	TRUE	E6	Sample 102	23.43		0
TRUE	E7	Sample 103	27.61		0																	TRUE	E7	Sample 103	24.18		0
TRUE	E8	Sample 104	27.57		0																	TRUE	E8	Sample 104	23.92		0
TRUE	E9	Sample 105	27.59		0																	TRUE	E9	Sample 105	23.95		0
TRUE	E10	Sample 106	27.43		0																	TRUE	E10	Sample 106	24.06		0
TRUE	E11	Sample 107	27.28		0																	TRUE	E11	Sample 107	23.73		0
TRUE	E12	Sample 108	27.15		0																	TRUE	E12	Sample 108	23.76		0
TRUE	E13	Sample 109	28.13		0																	TRUE	E13	Sample 109	24.04		0
TRUE	E14	Sample 110	28.17		0																	TRUE	E14	Sample 110	24.12		0
TRUE	E15	Sample 111	26.99		0																	TRUE	E15	Sample 111	23.85		0
TRUE	E16	Sample 112	26.88		0																	TRUE	E16	Sample 112	23.87		0
TRUE	E17	Sample 113	27.53		0																	TRUE	E17	Sample 113	24.15		0
TRUE	E18	Sample 114	27.57		0																	TRUE	E18	Sample 114	24.11		0
TRUE	E19	Sample 115	27.66		0																	TRUE	E19	Sample 115	24.52		0
TRUE	E20	Sample 116	27.26		0																	TRUE	E20	Sample 116	24.03		0
TRUE	E21	Sample 117	27.17		0																	TRUE	E21	Sample 117	24.1		0
TRUE	E22	Sample 118	27.13		0																	TRUE	E22	Sample 118	24.09		0
TRUE	E23	Sample 119	27.44		0																	TRUE	E23	Sample 119	23.68		0
TRUE	E24	Sample 120	27.3		0																	TRUE	E24	Sample 120	23.97		0
TRUE	F1	Sample 121	29.1		0																	TRUE	F1	Sample 121	24.8		0
TRUE	F2	Sample 122	28.85		0																	TRUE	F2	Sample 122	24.86		0
TRUE	F3	Sample 123	29.27		0																	TRUE	F3	Sample 123	26.82		0
TRUE	F4	Sample 124	29.48		0																	TRUE	F4	Sample 124	26.82		0
TRUE	F5	Sample 125	31.54		0																	TRUE	F5	Sample 125	29.42		0
TRUE	F6	Sample 126	31.59		0																	TRUE	F6	Sample 126	28.93		0
TRUE	F7	Sample 127	34.11		0																	TRUE	F7	Sample 127	31.78		0
TRUE	F8	Sample 128	33.67		0																	TRUE	F8	Sample 128	31.47		0
TRUE	F9	Sample 129	36.91		0																	TRUE	F9	Sample 129	33.81		0
TRUE	F10	Sample 130	36.69		0																	TRUE	F10	Sample 130	33.22		0
TRUE	F11	Sample 131			0																	TRUE	F11	Sample 131			0
TRUE	F12	Sample 132			0																	TRUE	F12	Sample 132			0
TRUE	F13	Sample 133			0																	TRUE	F13	Sample 133			0
TRUE	F14	Sample 134			0																	TRUE	F14	Sample 134			0
TRUE	F15	Sample 135			0																	TRUE	F15	Sample 135			0
TRUE	F16	Sample 136			0																	TRUE	F16	Sample 136			0
TRUE	F17	Sample 137			0																	TRUE	F17	Sample 137			0
TRUE	F18	Sample 138			0																	TRUE	F18	Sample 138			0
TRUE	F19	Sample 139			0																	TRUE	F19	Sample 139			0
TRUE	F20	Sample 140			0																	TRUE	F20	Sample 140			0
TRUE	F21	Sample 141			0																	TRUE	F21	Sample 141			0
TRUE	F22	Sample 142			0																	TRUE	F22	Sample 142			0
TRUE	F23	Sample 143			0																	TRUE	F23	Sample 143			0
TRUE	F24	Sample 144			0																	TRUE	F24	Sample 144			0
TRUE	G1	Sample 145	25.03		0																	TRUE	G1	Sample 145	26.67		0
TRUE	G2	Sample 146	24.88		0																	TRUE	G2	Sample 146	26.7		0
TRUE	G3	Sample 147	24.9		0																	TRUE	G3	Sample 147	26.18		0
TRUE	G4	Sample 148	24.89		0																	TRUE	G4	Sample 148	26.1		0
TRUE	G5	Sample 149	24.93		0																	TRUE	G5	Sample 149	25.98		0
TRUE	G6	Sample 150	24.79		0																	TRUE	G6	Sample 150	25.94		0
TRUE	G7	Sample 151	25.24		0																	TRUE	G7	Sample 151	26.43		0
TRUE	G8	Sample 152	25.14		0																	TRUE	G8	Sample 152	26.44		0
TRUE	G9	Sample 153	25.2		0																	TRUE	G9	Sample 153	26.12		0
TRUE	G10	Sample 154	25.16		0																	TRUE	G10	Sample 154	26.12		0
TRUE	G11	Sample 155	25.15		0																	TRUE	G11	Sample 155	26.01		0
TRUE	G12	Sample 156	25.12		0																	TRUE	G12	Sample 156	26.1		0
TRUE	G13	Sample 157	25.8		0																	TRUE	G13	Sample 157	26.42		0
TRUE	G14	Sample 158	25.77		0																	TRUE	G14	Sample 158	26.17		0
TRUE	G15	Sample 159	25.23		0																	TRUE	G15	Sample 159	26.15		0
TRUE	G16	Sample 160	25.2		0																	TRUE	G16	Sample 160	26.08		0
TRUE	G17	Sample 161	25.19		0																	TRUE	G17	Sample 161	25.9		0
TRUE	G18	Sample 162	25.24		0																	TRUE	G18	Sample 162	26.44		0
TRUE	G19	Sample 163	25.32		0																	TRUE	G19	Sample 163	26.15		0
TRUE	G20	Sample 164	25.25		0																	TRUE	G20	Sample 164	26.16		0
TRUE	G21	Sample 165	25.52		0																	TRUE	G21	Sample 165	26.43		0
TRUE	G22	Sample 166	25.43		0																	TRUE	G22	Sample 166	26.56		0
TRUE	G23	Sample 167	25.33		0																	TRUE	G23	Sample 167	26.51		0
TRUE	G24	Sample 168	25.33		0																	TRUE	G24	Sample 168	26.64		0
TRUE	H1	Sample 169	24.78		0																	TRUE	H1	Sample 169	27.7		0
TRUE	H2	Sample 170	24.88		0																	TRUE	H2	Sample 170	27.7		0
TRUE	H3	Sample 171	26.82		0																	TRUE	H3	Sample 171	28.44		0
TRUE	H4	Sample 172	26.94		0																	TRUE	H4	Sample 172	28.58		0
TRUE	H5	Sample 173	29.22		0																	TRUE	H5	Sample 173	30.52		0
TRUE	H6	Sample 174	29.11		0																	TRUE	H6	Sample 174	30.78		0
TRUE	H7	Sample 175	31.05		0																	TRUE	H7	Sample 175	33.66		0
TRUE	H8	Sample 176	31.26		0																	TRUE	H8	Sample 176	33.32		0
TRUE	H9	Sample 177	33.92		0																	TRUE	H9	Sample 177	36.73		0
TRUE	H10	Sample 178	33		0																	TRUE	H10	Sample 178	35.08		0
TRUE	H11	Sample 179			0																	TRUE	H11	Sample 179			0
TRUE	H12	Sample 180			0																	TRUE	H12	Sample 180			0
TRUE	H13	Sample 181			0																	TRUE	H13	Sample 181			0
TRUE	H14	Sample 182			0																	TRUE	H14	Sample 182			0
TRUE	H15	Sample 183			0																	TRUE	H15	Sample 183			0
TRUE	H16	Sample 184			0																	TRUE	H16	Sample 184			0
TRUE	H17	Sample 185			0																	TRUE	H17	Sample 185			0
TRUE	H18	Sample 186			0																	TRUE	H18	Sample 186			0
TRUE	H19	Sample 187			0																	TRUE	H19	Sample 187			0
TRUE	H20	Sample 188			0																	TRUE	H20	Sample 188			0
TRUE	H21	Sample 189			0																	TRUE	H21	Sample 189			0
TRUE	H22	Sample 190			0																	TRUE	H22	Sample 190			0
TRUE	H23	Sample 191			0																	TRUE	H23	Sample 191			0
TRUE	H24	Sample 192			0																	TRUE	H24	Sample 192			0
TRUE	I1	Sample 193	25.78		0																	TRUE	I1	Sample 193	23.32		0
TRUE	I2	Sample 194	25.51		0																	TRUE	I2	Sample 194	23.43		0
TRUE	I3	Sample 195	25.42		0																	TRUE	I3	Sample 195	22.16		0
TRUE	I4	Sample 196	25.2		0																	TRUE	I4	Sample 196	22.15		0
TRUE	I5	Sample 197	26.69		0																	TRUE	I5	Sample 197	21.89		0
TRUE	I6	Sample 198	26.74		0																	TRUE	I6	Sample 198	22.01		0
TRUE	I7	Sample 199	25.42		0																	TRUE	I7	Sample 199	22.94		0
TRUE	I8	Sample 200	25.32		0																	TRUE	I8	Sample 200	23.14		0
TRUE	I9	Sample 201	25.14		0																	TRUE	I9	Sample 201	23.56		0
TRUE	I10	Sample 202	25.23		0																	TRUE	I10	Sample 202	23.56		0
TRUE	I11	Sample 203	25.13		0																	TRUE	I11	Sample 203	23.02		0
TRUE	I12	Sample 204	25.17		0																	TRUE	I12	Sample 204	23.01		0
TRUE	I13	Sample 205	27.32		0																	TRUE	I13	Sample 205	22.44		0
TRUE	I14	Sample 206	27.46		0																	TRUE	I14	Sample 206	22.49		0
TRUE	I15	Sample 207	26.62		0																	TRUE	I15	Sample 207	22.33		0
TRUE	I16	Sample 208	26.75		0																	TRUE	I16	Sample 208	22.26		0
TRUE	I17	Sample 209	25.93		0																	TRUE	I17	Sample 209	22.42		0
TRUE	I18	Sample 210	25.89		0																	TRUE	I18	Sample 210	22.44		0
TRUE	I19	Sample 211	26.87		0																	TRUE	I19	Sample 211	23.87		0
TRUE	I20	Sample 212	26.74		0																	TRUE	I20	Sample 212	23.92		0
TRUE	I21	Sample 213	26.74		0																	TRUE	I21	Sample 213	23.55		0
TRUE	I22	Sample 214	26.76		0																	TRUE	I22	Sample 214	23.57		0
TRUE	I23	Sample 215	27		0																	TRUE	I23	Sample 215	23.29		0
TRUE	I24	Sample 216	26.81		0																	TRUE	I24	Sample 216	23.27		0
TRUE	J1	Sample 217	24.79		0																	TRUE	J1	Sample 217	27.31		0
TRUE	J2	Sample 218	24.77		0																	TRUE	J2	Sample 218	27.48		0
TRUE	J3	Sample 219	27.49		0																	TRUE	J3	Sample 219	29.44		0
TRUE	J4	Sample 220	27.55		0																	TRUE	J4	Sample 220	29.93		0
TRUE	J5	Sample 221	29.89		0																	TRUE	J5	Sample 221	32.31		0
TRUE	J6	Sample 222	29.83		0																	TRUE	J6	Sample 222	30.85		0
TRUE	J7	Sample 223	32.77		0																	TRUE	J7	Sample 223	34.93		0
TRUE	J8	Sample 224	32.58		0																	TRUE	J8	Sample 224	34.52		0
TRUE	J9	Sample 225	35.82		0																	TRUE	J9	Sample 225	34.9		0
TRUE	J10	Sample 226	35.29		0																	TRUE	J10	Sample 226	40		0	> - Late Cp call (last five cycles) has higher uncertainty
TRUE	J11	Sample 227			0																	TRUE	J11	Sample 227			0
TRUE	J12	Sample 228			0																	TRUE	J12	Sample 228			0
TRUE	J13	Sample 229			0																	TRUE	J13	Sample 229			0
TRUE	J14	Sample 230			0																	TRUE	J14	Sample 230			0
TRUE	J15	Sample 231			0																	TRUE	J15	Sample 231			0
TRUE	J16	Sample 232			0																	TRUE	J16	Sample 232			0
TRUE	J17	Sample 233			0																	TRUE	J17	Sample 233			0
TRUE	J18	Sample 234			0																	TRUE	J18	Sample 234			0
TRUE	J19	Sample 235			0																	TRUE	J19	Sample 235			0
TRUE	J20	Sample 236			0																	TRUE	J20	Sample 236			0
TRUE	J21	Sample 237			0																	TRUE	J21	Sample 237			0
TRUE	J22	Sample 238			0																	TRUE	J22	Sample 238			0
TRUE	J23	Sample 239			0																	TRUE	J23	Sample 239			0
TRUE	J24	Sample 240			0																	TRUE	J24	Sample 240			0
																						TRUE	K1	Sample 241	17.73		0
																						TRUE	K2	Sample 242	17.93		0
																						TRUE	K3	Sample 243	17.74		0
																						TRUE	K4	Sample 244	17.79		0
																						TRUE	K5	Sample 245	17.31		0
																						TRUE	K6	Sample 246	17.45		0
																						TRUE	K7	Sample 247	17.77		0
																						TRUE	K8	Sample 248	17.83		0
																						TRUE	K9	Sample 249	18.33		0
																						TRUE	K10	Sample 250	18.43		0
																						TRUE	K11	Sample 251	17.74		0
																						TRUE	K12	Sample 252	17.85		0
																						TRUE	K13	Sample 253	17.66		0
																						TRUE	K14	Sample 254	17.76		0
																						TRUE	K15	Sample 255	18.02		0
																						TRUE	K16	Sample 256	18.49		0
																						TRUE	K17	Sample 257	17.57		0
																						TRUE	K18	Sample 258	17.57		0
																						TRUE	K19	Sample 259	17.93		0
																						TRUE	K20	Sample 260	17.94		0
																						TRUE	K21	Sample 261	17.81		0
																						TRUE	K22	Sample 262	17.84		0
																						TRUE	K23	Sample 263	17.86		0
																						TRUE	K24	Sample 264	17.95		0
																						TRUE	L1	Sample 265	17.97		0
																						TRUE	L2	Sample 266	17.88		0
																						TRUE	L3	Sample 267	20.02		0
																						TRUE	L4	Sample 268	20.07		0
																						TRUE	L5	Sample 269	22.3		0
																						TRUE	L6	Sample 270	22.26		0
																						TRUE	L7	Sample 271	24.62		0
																						TRUE	L8	Sample 272	24.59		0
																						TRUE	L9	Sample 273	26.89		0
																						TRUE	L10	Sample 274	26.76		0
																						TRUE	L11	Sample 275	38.44		0
																						TRUE	L12	Sample 276			0
																						TRUE	L13	Sample 277			0
																						TRUE	L14	Sample 278			0
																						TRUE	L15	Sample 279			0
																						TRUE	L16	Sample 280			0
																						TRUE	L17	Sample 281			0
																						TRUE	L18	Sample 282			0
																						TRUE	L19	Sample 283			0
																						TRUE	L20	Sample 284			0
																						TRUE	L21	Sample 285			0
																						TRUE	L22	Sample 286			0
																						TRUE	L23	Sample 287			0
																						TRUE	L24	Sample 288			0
																						TRUE	M1	Sample 289	19.93		0
																						TRUE	M2	Sample 290	19.97		0
																						TRUE	M3	Sample 291	19.61		0
																						TRUE	M4	Sample 292	19.62		0
																						TRUE	M5	Sample 293	18.77		0
																						TRUE	M6	Sample 294	18.69		0
																						TRUE	M7	Sample 295	20.05		0
																						TRUE	M8	Sample 296	20.03		0
																						TRUE	M9	Sample 297	20.16		0
																						TRUE	M10	Sample 298	20.18		0
																						TRUE	M11	Sample 299	19.86		0
																						TRUE	M12	Sample 300	19.98		0
																						TRUE	M13	Sample 301	20.01		0
																						TRUE	M14	Sample 302	20.12		0
																						TRUE	M15	Sample 303	19.82		0
																						TRUE	M16	Sample 304	19.83		0
																						TRUE	M17	Sample 305	20.01		0
																						TRUE	M18	Sample 306	20.04		0
																						TRUE	M19	Sample 307	20.24		0
																						TRUE	M20	Sample 308	20.13		0
																						TRUE	M21	Sample 309	20.05		0
																						TRUE	M22	Sample 310	19.99		0
																						TRUE	M23	Sample 311	19.95		0
																						TRUE	M24	Sample 312	19.97		0
																						TRUE	N1	Sample 313	19.89		0
																						TRUE	N2	Sample 314	19.83		0
																						TRUE	N3	Sample 315	21.99		0
																						TRUE	N4	Sample 316	22.05		0
																						TRUE	N5	Sample 317	24.46		0
																						TRUE	N6	Sample 318	24.43		0
																						TRUE	N7	Sample 319	26.79		0
																						TRUE	N8	Sample 320	26.71		0
																						TRUE	N9	Sample 321	29.28		0
																						TRUE	N10	Sample 322	28.99		0
																						TRUE	N11	Sample 323			0
																						TRUE	N12	Sample 324			0
																						TRUE	N13	Sample 325			0
																						TRUE	N14	Sample 326			0
																						TRUE	N15	Sample 327			0
																						TRUE	N16	Sample 328			0
																						TRUE	N17	Sample 329			0
																						TRUE	N18	Sample 330			0
																						TRUE	N19	Sample 331			0
																						TRUE	N20	Sample 332			0
																						TRUE	N21	Sample 333			0
																						TRUE	N22	Sample 334			0
																						TRUE	N23	Sample 335			0
																						TRUE	N24	Sample 336			0
																						TRUE	O1	Sample 337	24.54		0
																						TRUE	O2	Sample 338	24.76		0
																						TRUE	O3	Sample 339	24.02		0
																						TRUE	O4	Sample 340	24.13		0
																						TRUE	O5	Sample 341	24.22		0
																						TRUE	O6	Sample 342	24.2		0
																						TRUE	O7	Sample 343	24.45		0
																						TRUE	O8	Sample 344	24.53		0
																						TRUE	O9	Sample 345	24.23		0
																						TRUE	O10	Sample 346	24.44		0
																						TRUE	O11	Sample 347	24.77		0
																						TRUE	O12	Sample 348	24.79		0
																						TRUE	O13	Sample 349	24.87		0
																						TRUE	O14	Sample 350	24.89		0
																						TRUE	O15	Sample 351	24.71		0
																						TRUE	O16	Sample 352	24.71		0
																						TRUE	O17	Sample 353	25.04		0
																						TRUE	O18	Sample 354	25.05		0
																						TRUE	O19	Sample 355	25.13		0
																						TRUE	O20	Sample 356	25.08		0
																						TRUE	O21	Sample 357	25.03		0
																						TRUE	O22	Sample 358	25.24		0
																						TRUE	O23	Sample 359	24.96		0
																						TRUE	O24	Sample 360	24.91		0
																						TRUE	P1	Sample 361	24.81		0
																						TRUE	P2	Sample 362	25.47		0
																						TRUE	P3	Sample 363	27.53		0
																						TRUE	P4	Sample 364	27.52		0
																						TRUE	P5	Sample 365	30.21		0
																						TRUE	P6	Sample 366	30.23		0
																						TRUE	P7	Sample 367	32.32		0
																						TRUE	P8	Sample 368	32.43		0
																						TRUE	P9	Sample 369	35.66		0
																						TRUE	P10	Sample 370	35.08		0
																						TRUE	P11	Sample 371			0
																						TRUE	P12	Sample 372			0
																						TRUE	P13	Sample 373			0
																						TRUE	P14	Sample 374			0
																						TRUE	P15	Sample 375			0
																						TRUE	P16	Sample 376			0
																						TRUE	P17	Sample 377			0
																						TRUE	P18	Sample 378			0
																						TRUE	P19	Sample 379			0
																						TRUE	P20	Sample 380			0
																						TRUE	P21	Sample 381			0
																						TRUE	P22	Sample 382			0
																						TRUE	P23	Sample 383			0
																						TRUE	P24	Sample 384			0

## Sheet: 72hpf
Include	Pos	Name	Cp	Concentration	Standard	Status		Actin	atoh8		Actin	atoh8		Actin	atoh8		Actin	atoh8			atoh8			atoh8
							72hpf, atoh8 WT													To actin
TRUE	A1	Sample 1	16.45		0		1	16.45	24.54		-0.96293	-0.747951		0.212296	0.300058		0.210018	0.279792		1	1.33223		atoh8 WT	1.37584
																							SD	0.0918556
TRUE	A2	Sample 2	16.48		0			16.48	24.76		-0.97641	-0.838115		0.207739	0.259527
TRUE	A3	Sample 3	16.06		0		2	16.06	24.02		-0.787688	-0.534836		0.281468	0.42283		0.266091	0.408034		2	1.53344		atoh8 null	1.25033
																							SD	0.281624
TRUE	A4	Sample 4	16.22		0			16.22	24.13		-0.859582	-0.579918		0.250714	0.393237
TRUE	A5	Sample 5	16.17		0		3	16.17	24.22		-0.837115	-0.616803		0.259945	0.370572		0.270707	0.373033		3	1.378
																							To WT
TRUE	A6	Sample 6	16.06		0			16.06	24.2		-0.787688	-0.608607		0.281468	0.375493									atoh8
TRUE	A7	Sample 7	16.3		0		4	16.3	24.45		-0.895529	-0.711066		0.23662	0.31841		0.237479	0.310227		4	1.30633		atoh8 WT	1
																							SD	0.0667633
TRUE	A8	Sample 8	16.29		0			16.29	24.53		-0.891036	-0.743852		0.238338	0.302043
TRUE	A9	Sample 9	16.15		0		5	16.15	24.23		-0.828129	-0.620902		0.263732	0.368136		0.259049	0.344327		5	1.32919		atoh8 null	0.908774
																							SD	0.204692
TRUE	A10	Sample 10	16.2		0			16.2	24.44		-0.850595	-0.706967		0.254366	0.320517
							72hpf, atoh8 sa1465
TRUE	A11	Sample 11	16.14		0		1	16.14	24.77		-0.823635	-0.842213		0.265646	0.257821		0.215832	0.256132		1	1.18672
TRUE	A12	Sample 12	16.79		0			16.79	24.79		-1.1157	-0.85041		0.166018	0.254442
TRUE	A13	Sample 13	16.69		0		2	16.69	24.87		-1.07077	-0.883197		0.178469	0.241364		0.193104	0.239782		2	1.24172
TRUE	A14	Sample 14	16.48		0			16.48	24.89		-0.97641	-0.891393		0.207739	0.238201
TRUE	A15	Sample 15	16.5		0		3	16.5	24.71		-0.985397	-0.817623		0.204756	0.268229		0.19557	0.268229		3	1.37153
TRUE	A16	Sample 16	16.63		0			16.63	24.71		-1.04381	-0.817623		0.186384	0.268229
TRUE	A17	Sample 17	16.6		0		4	16.6	25.04		-1.03033	-0.952869		0.190472	0.215761		0.19256	0.215052		4	1.1168
TRUE	A18	Sample 18	16.57		0			16.57	25.05		-1.01685	-0.956967		0.194649	0.214343
TRUE	A19	Sample 19	17.18		0		5	17.18	25.13		-1.29095	-0.989754		0.125218	0.203325		0.114487	0.206734		5	1.80575
TRUE	A20	Sample 20	17.44		0			17.44	25.08		-1.40777	-0.969262		0.103755	0.210143
TRUE	A21	Sample 21	16.26		0		6	16.26	25.03		-0.877556	-0.94877		0.243565	0.217189		0.221963	0.203142		6	0.915205
TRUE	A22	Sample 22	16.53		0			16.53	25.24		-0.998877	-1.03484		0.200362	0.189095
TRUE	A23	Sample 23	16.21		0		7	16.21	24.96		-0.855089	-0.920082		0.252533	0.227452		0.207494	0.231266		7	1.11456
TRUE	A24	Sample 24	16.82		0			16.82	24.91		-1.12918	-0.89959		0.162455	0.235079
							Standards, serial 5x
TRUE	B1	Sample 25	16.64		0		-1	16.64	24.81
TRUE	B2	Sample 26	16.64		0		-1	16.64	25.47
TRUE	B3	Sample 27	18.7		0		-2	18.7	27.53
TRUE	B4	Sample 28	18.67		0		-2	18.67	27.52
TRUE	B5	Sample 29	20.89		0		-3	20.89	30.21
TRUE	B6	Sample 30	20.88		0		-3	20.88	30.23
TRUE	B7	Sample 31	23.21		0		-4	23.21	32.32
TRUE	B8	Sample 32	23.17		0		-4	23.17	32.43
TRUE	B9	Sample 33	25.54		0		-5	25.54	35.66
TRUE	B10	Sample 34	25.49		0		-5	25.49	35.08
TRUE	B11	Sample 35	37.96		0		NTC	37.96	0
TRUE	B12	Sample 36			0
TRUE	B13	Sample 37			0		intercept	14.307	22.715
							gradient	-2.2255	-2.44
TRUE	B14	Sample 38			0
TRUE	B15	Sample 39			0
TRUE	B16	Sample 40			0
TRUE	B17	Sample 41			0
TRUE	B18	Sample 42			0
TRUE	B19	Sample 43			0
TRUE	B20	Sample 44			0
TRUE	B21	Sample 45			0
TRUE	B22	Sample 46			0
TRUE	B23	Sample 47			0
TRUE	B24	Sample 48			0
TRUE	C1	Sample 49	26.33		0
TRUE	C2	Sample 50	26.16		0
TRUE	C3	Sample 51	25.85		0
TRUE	C4	Sample 52	25.79		0
TRUE	C5	Sample 53	25.83		0
TRUE	C6	Sample 54	25.83		0
TRUE	C7	Sample 55	25.98		0
TRUE	C8	Sample 56	26.05		0
TRUE	C9	Sample 57	26.01		0
TRUE	C10	Sample 58	25.97		0
TRUE	C11	Sample 59	25.16		0
TRUE	C12	Sample 60	25.07		0
TRUE	C13	Sample 61	25.27		0
TRUE	C14	Sample 62	25.09		0
TRUE	C15	Sample 63	25.04		0
TRUE	C16	Sample 64	25		0
TRUE	C17	Sample 65	25.62		0
TRUE	C18	Sample 66	25.51		0
TRUE	C19	Sample 67	25.43		0
TRUE	C20	Sample 68	25.16		0
TRUE	C21	Sample 69	25.32		0
TRUE	C22	Sample 70	25.3		0
TRUE	C23	Sample 71	25.3		0
TRUE	C24	Sample 72	25.42		0
TRUE	D1	Sample 73	26.11		0
TRUE	D2	Sample 74	26.04		0
TRUE	D3	Sample 75	28.22		0
TRUE	D4	Sample 76	28.28		0
TRUE	D5	Sample 77	31.15		0
TRUE	D6	Sample 78	30.31		0
TRUE	D7	Sample 79	32.28		0
TRUE	D8	Sample 80	32.48		0
TRUE	D9	Sample 81	40		0	> - Late Cp call (last five cycles) has higher uncertainty
TRUE	D10	Sample 82	40		0	> - Late Cp call (last five cycles) has higher uncertainty
TRUE	D11	Sample 83			0
TRUE	D12	Sample 84			0
TRUE	D13	Sample 85			0
TRUE	D14	Sample 86			0
TRUE	D15	Sample 87			0
TRUE	D16	Sample 88			0
TRUE	D17	Sample 89			0
TRUE	D18	Sample 90			0
TRUE	D19	Sample 91			0
TRUE	D20	Sample 92			0
TRUE	D21	Sample 93			0
TRUE	D22	Sample 94			0
TRUE	D23	Sample 95			0
TRUE	D24	Sample 96			0
TRUE	E1	Sample 97	23.94		0
TRUE	E2	Sample 98	24.03		0
TRUE	E3	Sample 99	23.66		0
TRUE	E4	Sample 100	23.77		0
TRUE	E5	Sample 101	23.3		0
TRUE	E6	Sample 102	23.43		0
TRUE	E7	Sample 103	24.18		0
TRUE	E8	Sample 104	23.92		0
TRUE	E9	Sample 105	23.95		0
TRUE	E10	Sample 106	24.06		0
TRUE	E11	Sample 107	23.73		0
TRUE	E12	Sample 108	23.76		0
TRUE	E13	Sample 109	24.04		0
TRUE	E14	Sample 110	24.12		0
TRUE	E15	Sample 111	23.85		0
TRUE	E16	Sample 112	23.87		0
TRUE	E17	Sample 113	24.15		0
TRUE	E18	Sample 114	24.11		0
TRUE	E19	Sample 115	24.52		0
TRUE	E20	Sample 116	24.03		0
TRUE	E21	Sample 117	24.1		0
TRUE	E22	Sample 118	24.09		0
TRUE	E23	Sample 119	23.68		0
TRUE	E24	Sample 120	23.97		0
TRUE	F1	Sample 121	24.8		0
TRUE	F2	Sample 122	24.86		0
TRUE	F3	Sample 123	26.82		0
TRUE	F4	Sample 124	26.82		0
TRUE	F5	Sample 125	29.42		0
TRUE	F6	Sample 126	28.93		0
TRUE	F7	Sample 127	31.78		0
TRUE	F8	Sample 128	31.47		0
TRUE	F9	Sample 129	33.81		0
TRUE	F10	Sample 130	33.22		0
TRUE	F11	Sample 131			0
TRUE	F12	Sample 132			0
TRUE	F13	Sample 133			0
TRUE	F14	Sample 134			0
TRUE	F15	Sample 135			0
TRUE	F16	Sample 136			0
TRUE	F17	Sample 137			0
TRUE	F18	Sample 138			0
TRUE	F19	Sample 139			0
TRUE	F20	Sample 140			0
TRUE	F21	Sample 141			0
TRUE	F22	Sample 142			0
TRUE	F23	Sample 143			0
TRUE	F24	Sample 144			0
TRUE	G1	Sample 145	26.67		0
TRUE	G2	Sample 146	26.7		0
TRUE	G3	Sample 147	26.18		0
TRUE	G4	Sample 148	26.1		0
TRUE	G5	Sample 149	25.98		0
TRUE	G6	Sample 150	25.94		0
TRUE	G7	Sample 151	26.43		0
TRUE	G8	Sample 152	26.44		0
TRUE	G9	Sample 153	26.12		0
TRUE	G10	Sample 154	26.12		0
TRUE	G11	Sample 155	26.01		0
TRUE	G12	Sample 156	26.1		0
TRUE	G13	Sample 157	26.42		0
TRUE	G14	Sample 158	26.17		0
TRUE	G15	Sample 159	26.15		0
TRUE	G16	Sample 160	26.08		0
TRUE	G17	Sample 161	25.9		0
TRUE	G18	Sample 162	26.44		0
TRUE	G19	Sample 163	26.15		0
TRUE	G20	Sample 164	26.16		0
TRUE	G21	Sample 165	26.43		0
TRUE	G22	Sample 166	26.56		0
TRUE	G23	Sample 167	26.51		0
TRUE	G24	Sample 168	26.64		0
TRUE	H1	Sample 169	27.7		0
TRUE	H2	Sample 170	27.7		0
TRUE	H3	Sample 171	28.44		0
TRUE	H4	Sample 172	28.58		0
TRUE	H5	Sample 173	30.52		0
TRUE	H6	Sample 174	30.78		0
TRUE	H7	Sample 175	33.66		0
TRUE	H8	Sample 176	33.32		0
TRUE	H9	Sample 177	36.73		0
TRUE	H10	Sample 178	35.08		0
TRUE	H11	Sample 179			0
TRUE	H12	Sample 180			0
TRUE	H13	Sample 181			0
TRUE	H14	Sample 182			0
TRUE	H15	Sample 183			0
TRUE	H16	Sample 184			0
TRUE	H17	Sample 185			0
TRUE	H18	Sample 186			0
TRUE	H19	Sample 187			0
TRUE	H20	Sample 188			0
TRUE	H21	Sample 189			0
TRUE	H22	Sample 190			0
TRUE	H23	Sample 191			0
TRUE	H24	Sample 192			0
TRUE	I1	Sample 193	23.32		0
TRUE	I2	Sample 194	23.43		0
TRUE	I3	Sample 195	22.16		0
TRUE	I4	Sample 196	22.15		0
TRUE	I5	Sample 197	21.89		0
TRUE	I6	Sample 198	22.01		0
TRUE	I7	Sample 199	22.94		0
TRUE	I8	Sample 200	23.14		0
TRUE	I9	Sample 201	23.56		0
TRUE	I10	Sample 202	23.56		0
TRUE	I11	Sample 203	23.02		0
TRUE	I12	Sample 204	23.01		0
TRUE	I13	Sample 205	22.44		0
TRUE	I14	Sample 206	22.49		0
TRUE	I15	Sample 207	22.33		0
TRUE	I16	Sample 208	22.26		0
TRUE	I17	Sample 209	22.42		0
TRUE	I18	Sample 210	22.44		0
TRUE	I19	Sample 211	23.87		0
TRUE	I20	Sample 212	23.92		0
TRUE	I21	Sample 213	23.55		0
TRUE	I22	Sample 214	23.57		0
TRUE	I23	Sample 215	23.29		0
TRUE	I24	Sample 216	23.27		0
TRUE	J1	Sample 217	27.31		0
TRUE	J2	Sample 218	27.48		0
TRUE	J3	Sample 219	29.44		0
TRUE	J4	Sample 220	29.93		0
TRUE	J5	Sample 221	32.31		0
TRUE	J6	Sample 222	30.85		0
TRUE	J7	Sample 223	34.93		0
TRUE	J8	Sample 224	34.52		0
TRUE	J9	Sample 225	34.9		0
TRUE	J10	Sample 226	40		0	> - Late Cp call (last five cycles) has higher uncertainty
TRUE	J11	Sample 227			0
TRUE	J12	Sample 228			0
TRUE	J13	Sample 229			0
TRUE	J14	Sample 230			0
TRUE	J15	Sample 231			0
TRUE	J16	Sample 232			0
TRUE	J17	Sample 233			0
TRUE	J18	Sample 234			0
TRUE	J19	Sample 235			0
TRUE	J20	Sample 236			0
TRUE	J21	Sample 237			0
TRUE	J22	Sample 238			0
TRUE	J23	Sample 239			0
TRUE	J24	Sample 240			0
TRUE	K1	Sample 241	17.73		0
TRUE	K2	Sample 242	17.93		0
TRUE	K3	Sample 243	17.74		0
TRUE	K4	Sample 244	17.79		0
TRUE	K5	Sample 245	17.31		0
TRUE	K6	Sample 246	17.45		0
TRUE	K7	Sample 247	17.77		0
TRUE	K8	Sample 248	17.83		0
TRUE	K9	Sample 249	18.33		0
TRUE	K10	Sample 250	18.43		0
TRUE	K11	Sample 251	17.74		0
TRUE	K12	Sample 252	17.85		0
TRUE	K13	Sample 253	17.66		0
TRUE	K14	Sample 254	17.76		0
TRUE	K15	Sample 255	18.02		0
TRUE	K16	Sample 256	18.49		0
TRUE	K17	Sample 257	17.57		0
TRUE	K18	Sample 258	17.57		0
TRUE	K19	Sample 259	17.93		0
TRUE	K20	Sample 260	17.94		0
TRUE	K21	Sample 261	17.81		0
TRUE	K22	Sample 262	17.84		0
TRUE	K23	Sample 263	17.86		0
TRUE	K24	Sample 264	17.95		0
TRUE	L1	Sample 265	17.97		0
TRUE	L2	Sample 266	17.88		0
TRUE	L3	Sample 267	20.02		0
TRUE	L4	Sample 268	20.07		0
TRUE	L5	Sample 269	22.3		0
TRUE	L6	Sample 270	22.26		0
TRUE	L7	Sample 271	24.62		0
TRUE	L8	Sample 272	24.59		0
TRUE	L9	Sample 273	26.89		0
TRUE	L10	Sample 274	26.76		0
TRUE	L11	Sample 275	38.44		0
TRUE	L12	Sample 276			0
TRUE	L13	Sample 277			0
TRUE	L14	Sample 278			0
TRUE	L15	Sample 279			0
TRUE	L16	Sample 280			0
TRUE	L17	Sample 281			0
TRUE	L18	Sample 282			0
TRUE	L19	Sample 283			0
TRUE	L20	Sample 284			0
TRUE	L21	Sample 285			0
TRUE	L22	Sample 286			0
TRUE	L23	Sample 287			0
TRUE	L24	Sample 288			0
TRUE	M1	Sample 289	19.93		0
TRUE	M2	Sample 290	19.97		0
TRUE	M3	Sample 291	19.61		0
TRUE	M4	Sample 292	19.62		0
TRUE	M5	Sample 293	18.77		0
TRUE	M6	Sample 294	18.69		0
TRUE	M7	Sample 295	20.05		0
TRUE	M8	Sample 296	20.03		0
TRUE	M9	Sample 297	20.16		0
TRUE	M10	Sample 298	20.18		0
TRUE	M11	Sample 299	19.86		0
TRUE	M12	Sample 300	19.98		0
TRUE	M13	Sample 301	20.01		0
TRUE	M14	Sample 302	20.12		0
TRUE	M15	Sample 303	19.82		0
TRUE	M16	Sample 304	19.83		0
TRUE	M17	Sample 305	20.01		0
TRUE	M18	Sample 306	20.04		0
TRUE	M19	Sample 307	20.24		0
TRUE	M20	Sample 308	20.13		0
TRUE	M21	Sample 309	20.05		0
TRUE	M22	Sample 310	19.99		0
TRUE	M23	Sample 311	19.95		0
TRUE	M24	Sample 312	19.97		0
TRUE	N1	Sample 313	19.89		0
TRUE	N2	Sample 314	19.83		0
TRUE	N3	Sample 315	21.99		0
TRUE	N4	Sample 316	22.05		0
TRUE	N5	Sample 317	24.46		0
TRUE	N6	Sample 318	24.43		0
TRUE	N7	Sample 319	26.79		0
TRUE	N8	Sample 320	26.71		0
TRUE	N9	Sample 321	29.28		0
TRUE	N10	Sample 322	28.99		0
TRUE	N11	Sample 323			0
TRUE	N12	Sample 324			0
TRUE	N13	Sample 325			0
TRUE	N14	Sample 326			0
TRUE	N15	Sample 327			0
TRUE	N16	Sample 328			0
TRUE	N17	Sample 329			0
TRUE	N18	Sample 330			0
TRUE	N19	Sample 331			0
TRUE	N20	Sample 332			0
TRUE	N21	Sample 333			0
TRUE	N22	Sample 334			0
TRUE	N23	Sample 335			0
TRUE	N24	Sample 336			0
TRUE	O1	Sample 337	24.54		0
TRUE	O2	Sample 338	24.76		0
TRUE	O3	Sample 339	24.02		0
TRUE	O4	Sample 340	24.13		0
TRUE	O5	Sample 341	24.22		0
TRUE	O6	Sample 342	24.2		0
TRUE	O7	Sample 343	24.45		0
TRUE	O8	Sample 344	24.53		0
TRUE	O9	Sample 345	24.23		0
TRUE	O10	Sample 346	24.44		0
TRUE	O11	Sample 347	24.77		0
TRUE	O12	Sample 348	24.79		0
TRUE	O13	Sample 349	24.87		0
TRUE	O14	Sample 350	24.89		0
TRUE	O15	Sample 351	24.71		0
TRUE	O16	Sample 352	24.71		0
TRUE	O17	Sample 353	25.04		0
TRUE	O18	Sample 354	25.05		0
TRUE	O19	Sample 355	25.13		0
TRUE	O20	Sample 356	25.08		0
TRUE	O21	Sample 357	25.03		0
TRUE	O22	Sample 358	25.24		0
TRUE	O23	Sample 359	24.96		0
TRUE	O24	Sample 360	24.91		0
TRUE	P1	Sample 361	24.81		0
TRUE	P2	Sample 362	25.47		0
TRUE	P3	Sample 363	27.53		0
TRUE	P4	Sample 364	27.52		0
TRUE	P5	Sample 365	30.21		0
TRUE	P6	Sample 366	30.23		0
TRUE	P7	Sample 367	32.32		0
TRUE	P8	Sample 368	32.43		0
TRUE	P9	Sample 369	35.66		0
TRUE	P10	Sample 370	35.08		0
TRUE	P11	Sample 371			0
TRUE	P12	Sample 372			0
TRUE	P13	Sample 373			0
TRUE	P14	Sample 374			0
TRUE	P15	Sample 375			0
TRUE	P16	Sample 376			0
TRUE	P17	Sample 377			0
TRUE	P18	Sample 378			0
TRUE	P19	Sample 379			0
TRUE	P20	Sample 380			0
TRUE	P21	Sample 381			0
TRUE	P22	Sample 382			0
TRUE	P23	Sample 383			0
TRUE	P24	Sample 384			0
